# Supplementary material
Source: publisher site journal article supplement (https://www.dovepress.com/article/485685)
Supplement: Supplementary file 1 [file get_supplementary_file.php]

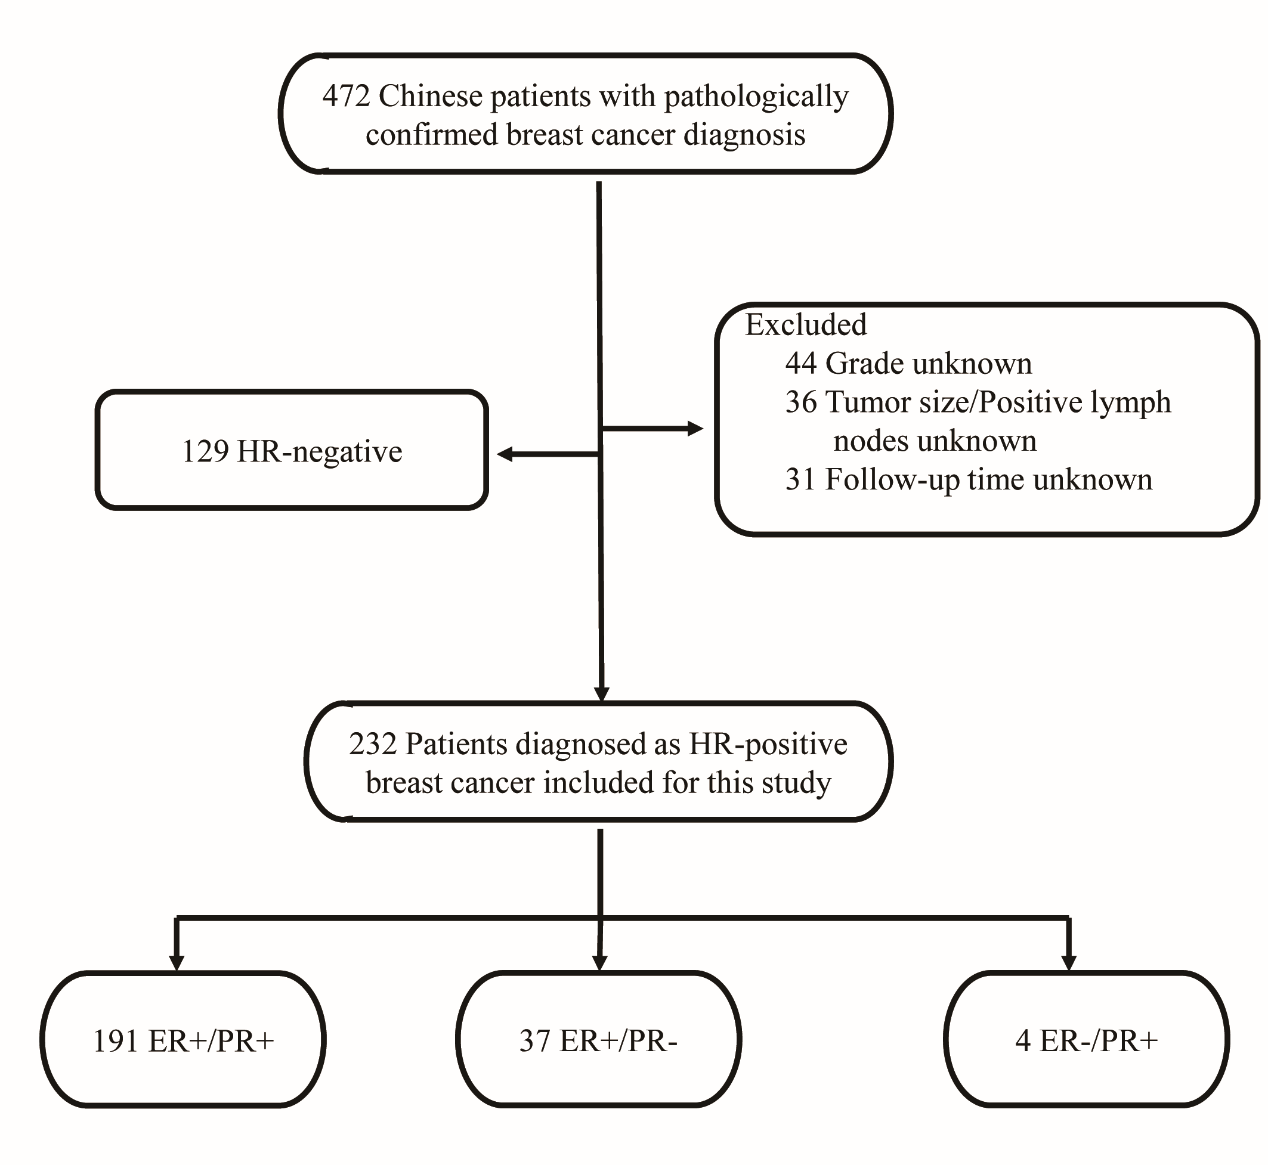
**Supplemental Figure S1.** Flowchart of externally independent validation (First Affiliated Hospital of Nanchang University) cohort patient registration.


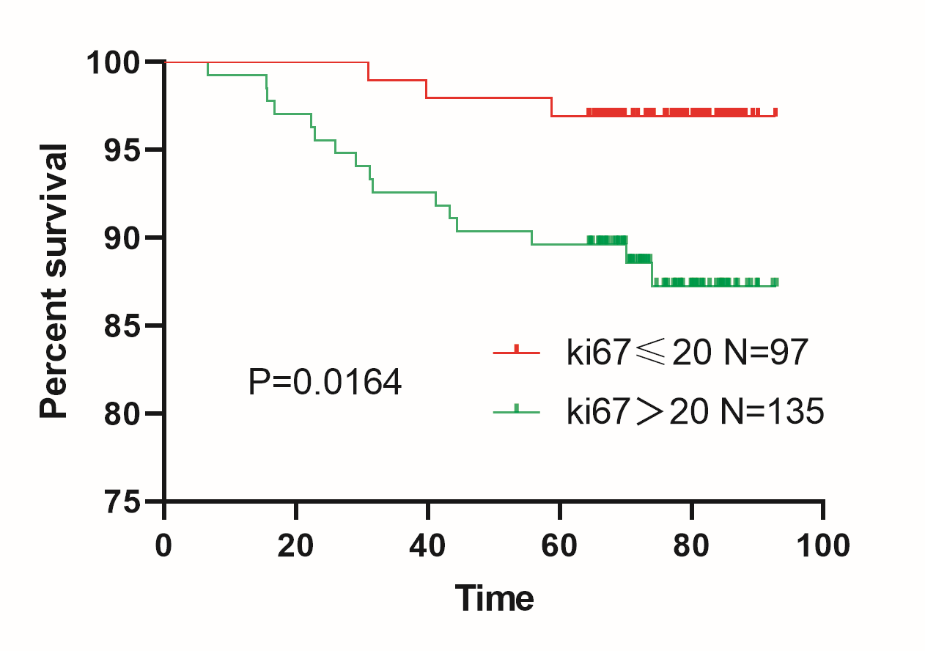


**Supplemental Figure S2.** In the external independent validation cohort, there was a significant survival difference between the high Ki67 expression group (＞20%) and the low Ki67 expression group (≤20%) (P=0.0164).


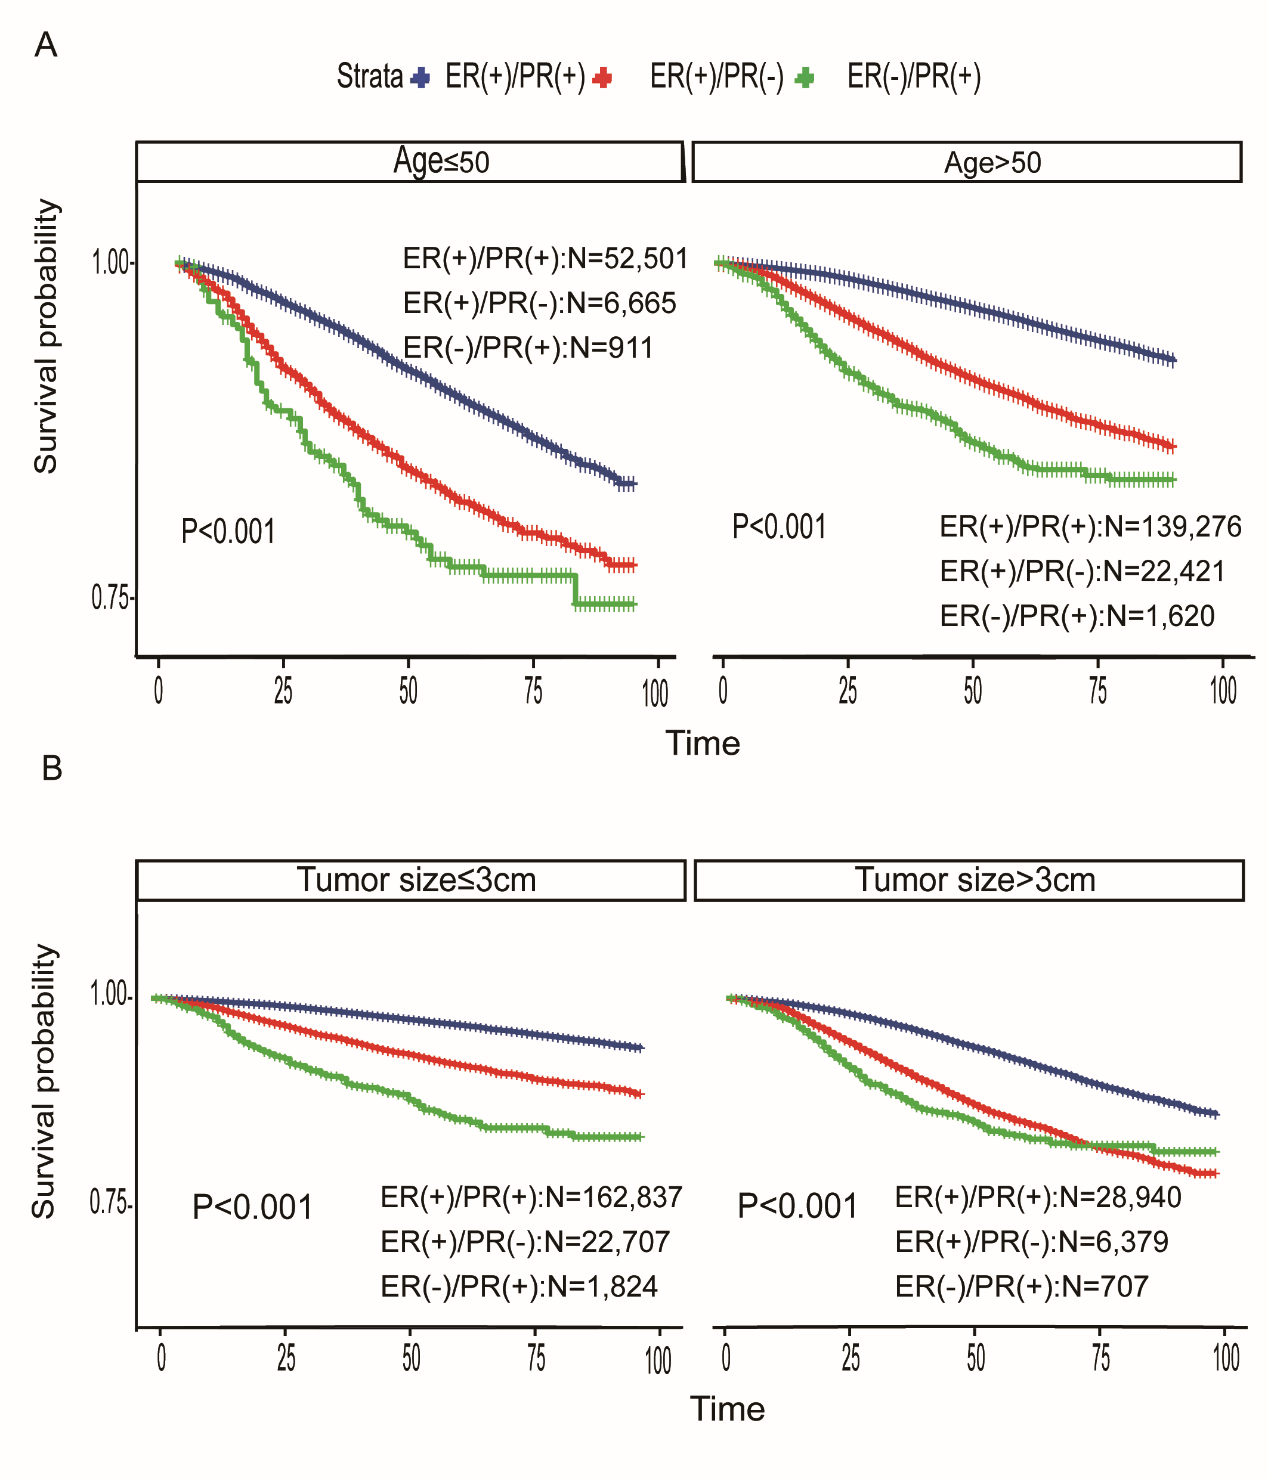


**Supplemental Figure S3.** BCSS stratified by age at diagnosis and tumor size. BCSS of patients with HR-positive BC stratified by (A) age at diagnosis≤50 years and age at diagnosis＞50 years; (B) tumor size≤3cm and tumor size>3cm.

**
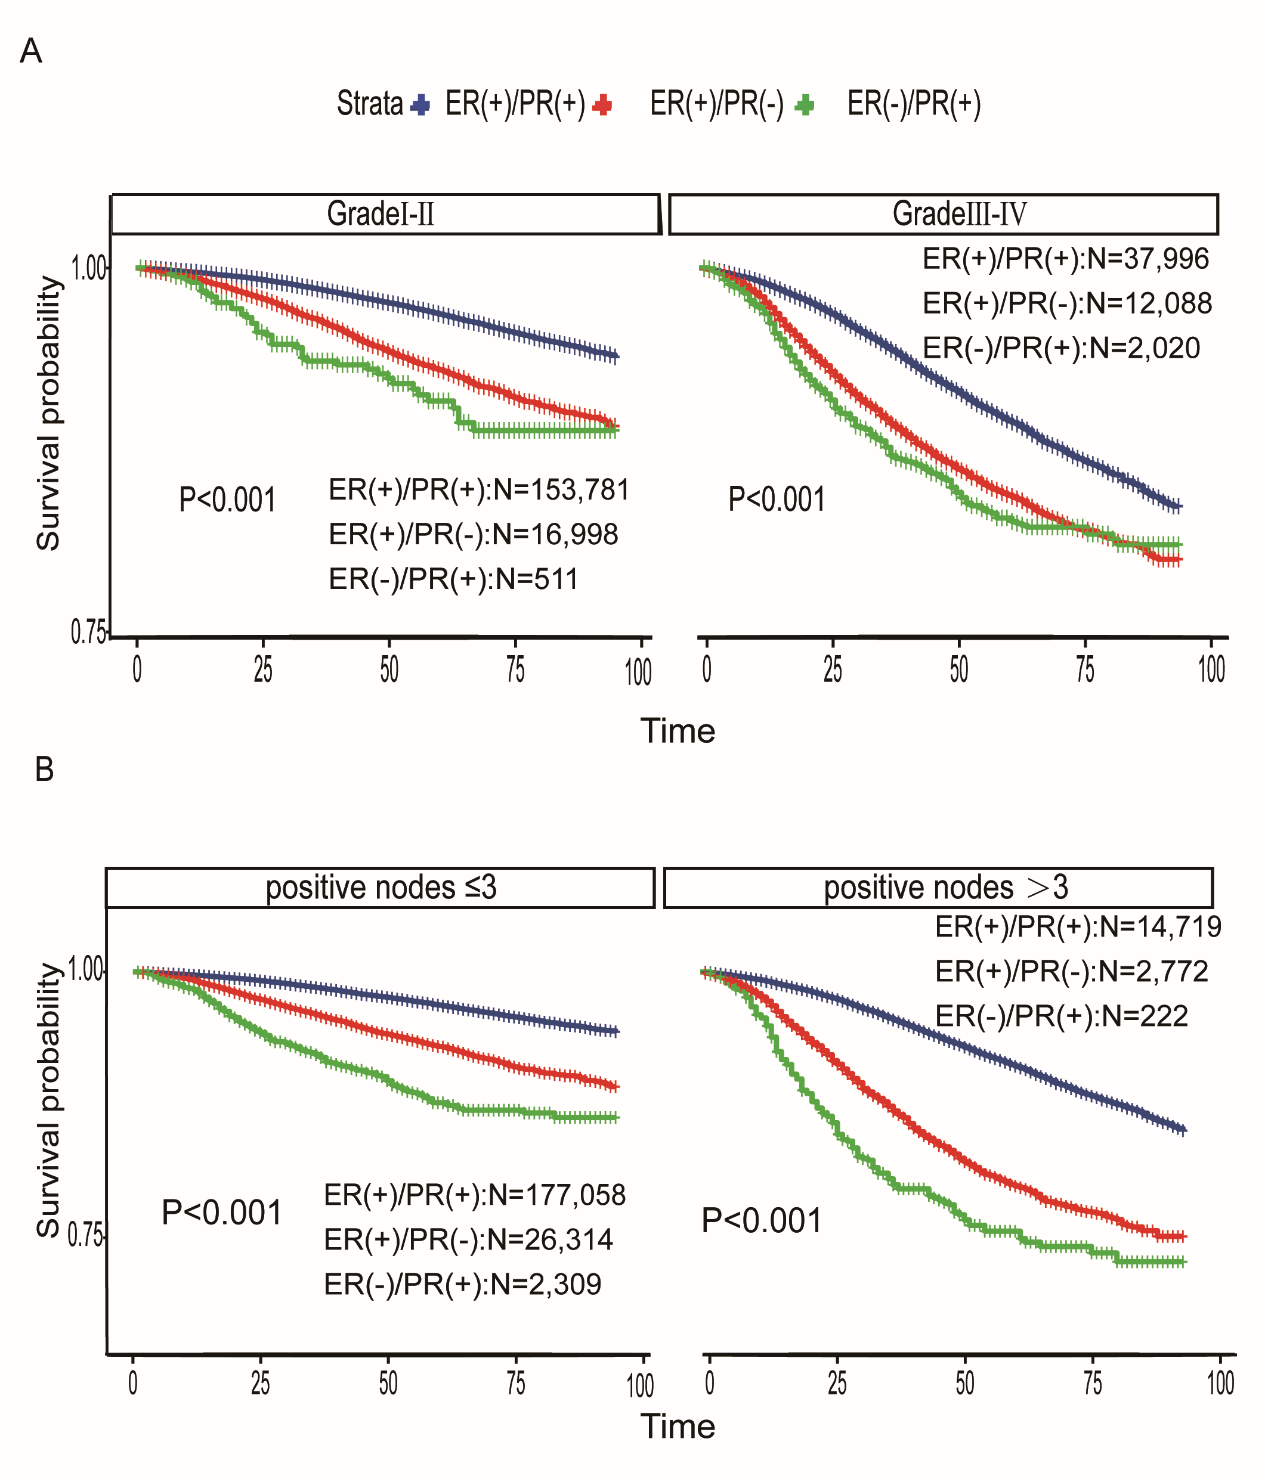
**

**Supplemental Figure S4.** BCSS stratified by Grade and positive nodes. BCSS of patients with HR-positive BC stratified by(A) Grade Ⅰ-Ⅱ and Grade Ⅲ-Ⅳ. (B) positive nodes≤3 and positive nodes＞3.


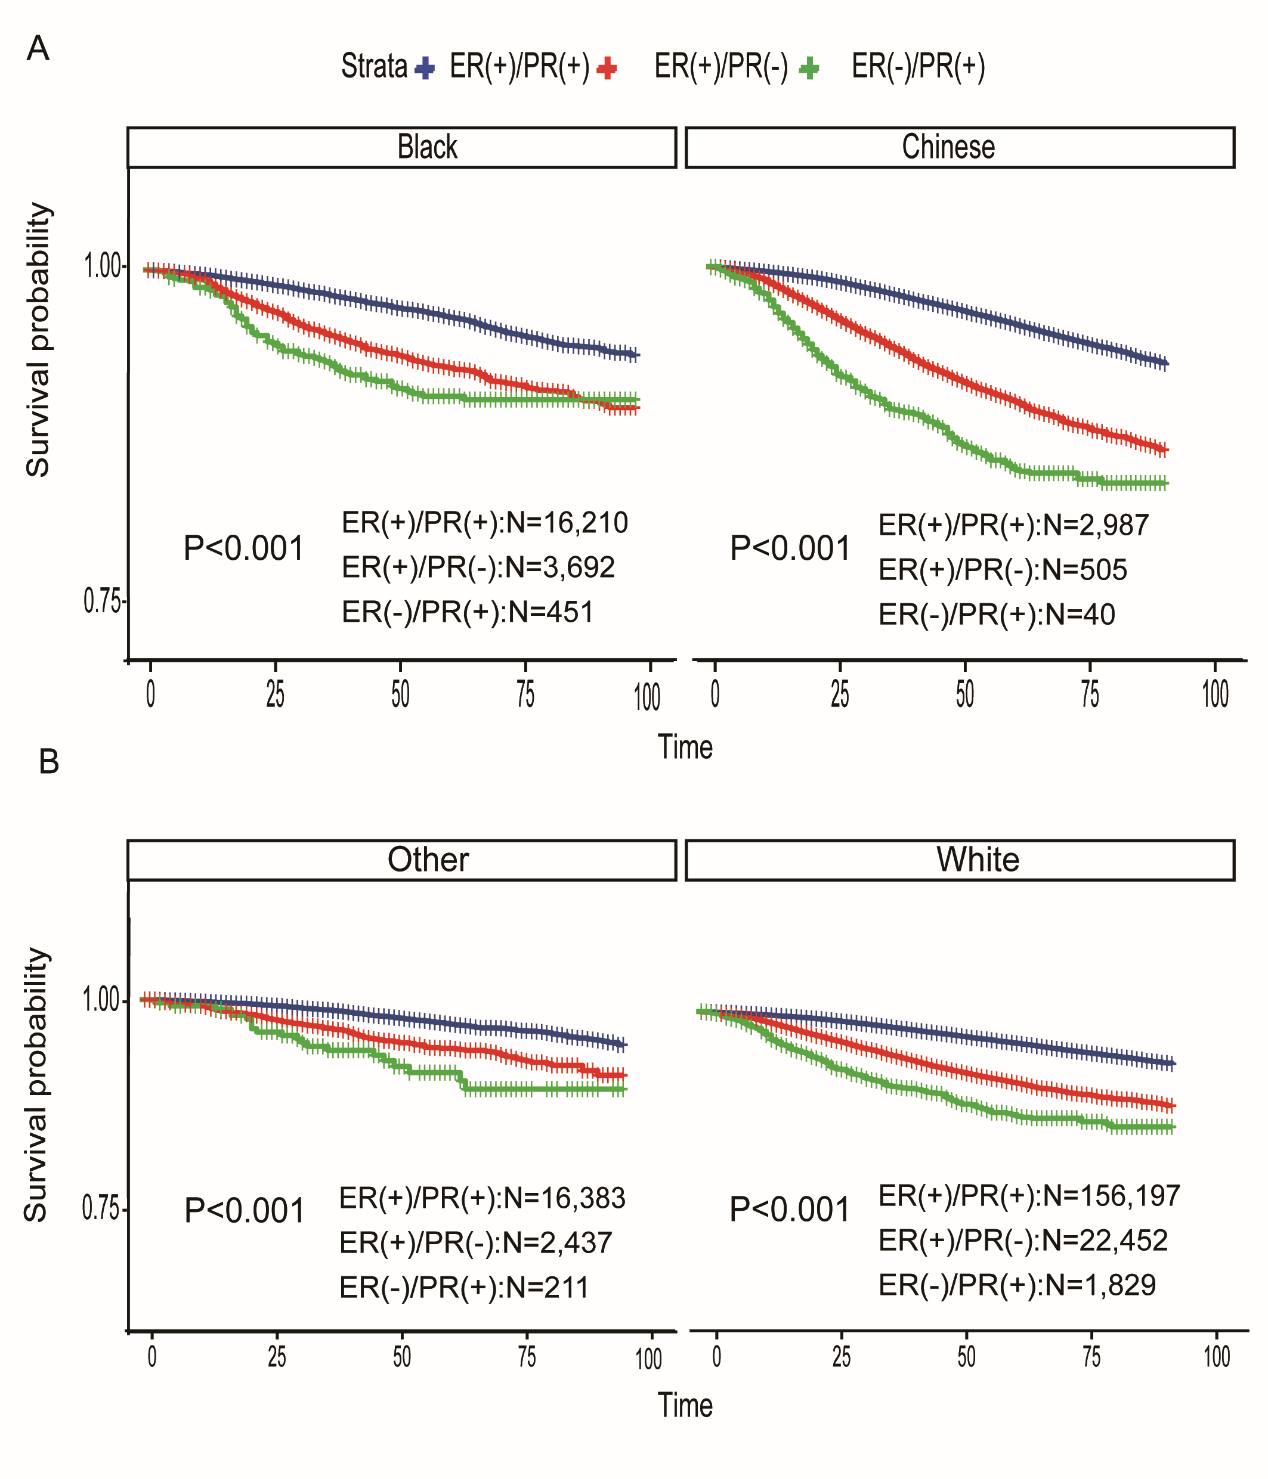


**Supplemental Figure S5.** BCSS stratified by Race. BCSS of patients with HR-positive BC stratified by (A) Black and Chinese. (B) Other races and White.


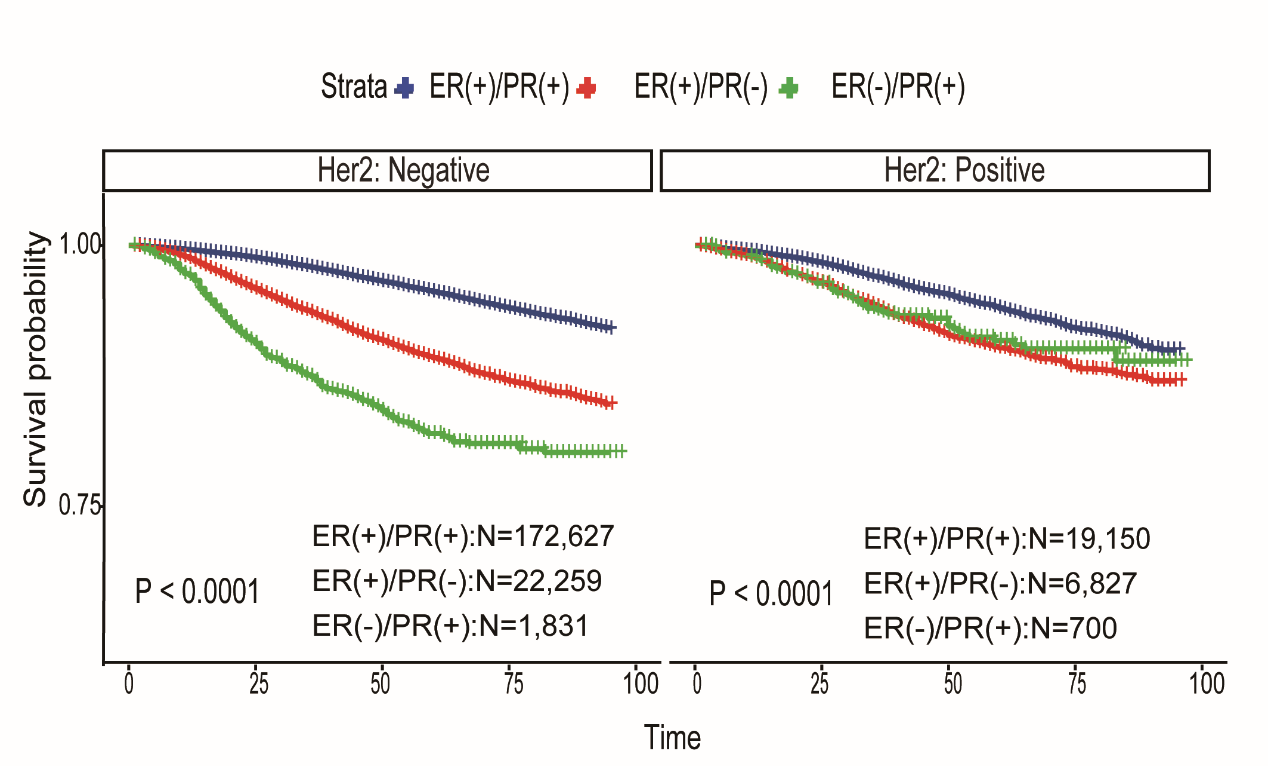


**Supplemental Figure S6.** BCSS stratified by Her2.


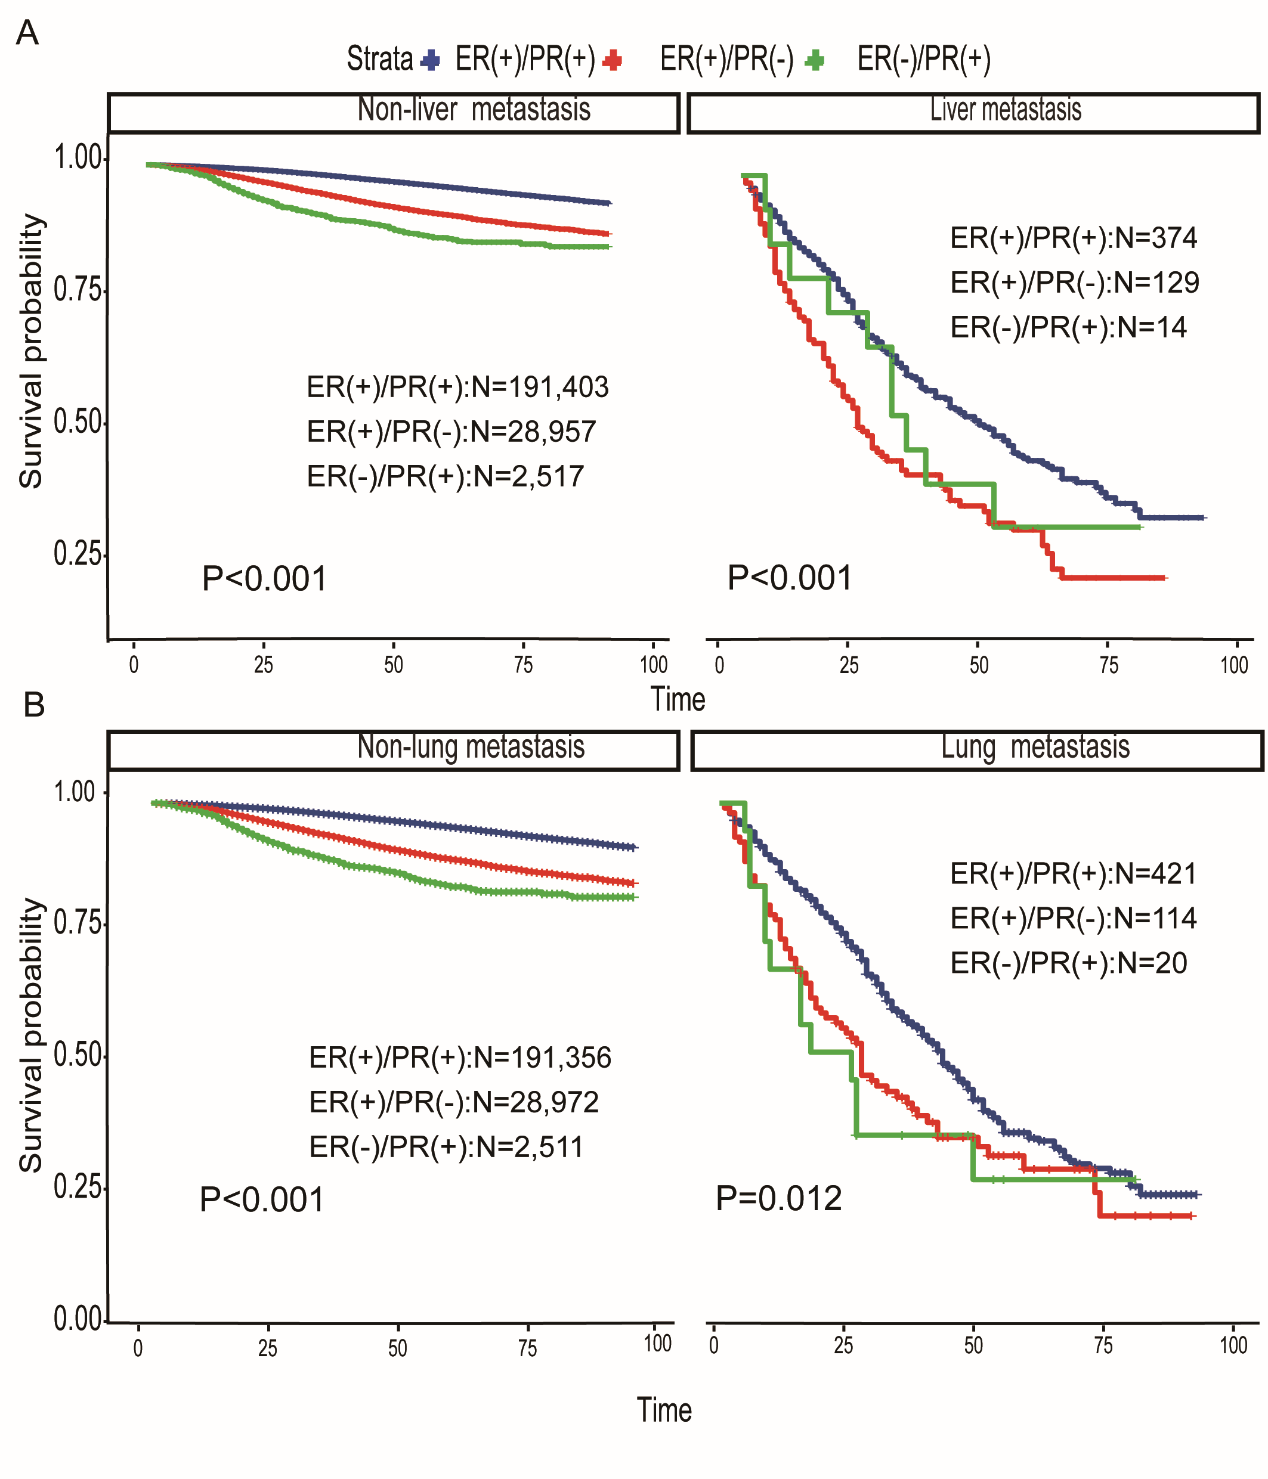


**Supplemental Figure S7.** BCSS stratified by Liver metastasis and Lung metastasis. BCSS survival of patients with HR-positive BC stratified by (A) Non-liver metastasis and with liver metastases. (B) Non-lung metastasis and with lung metastases.


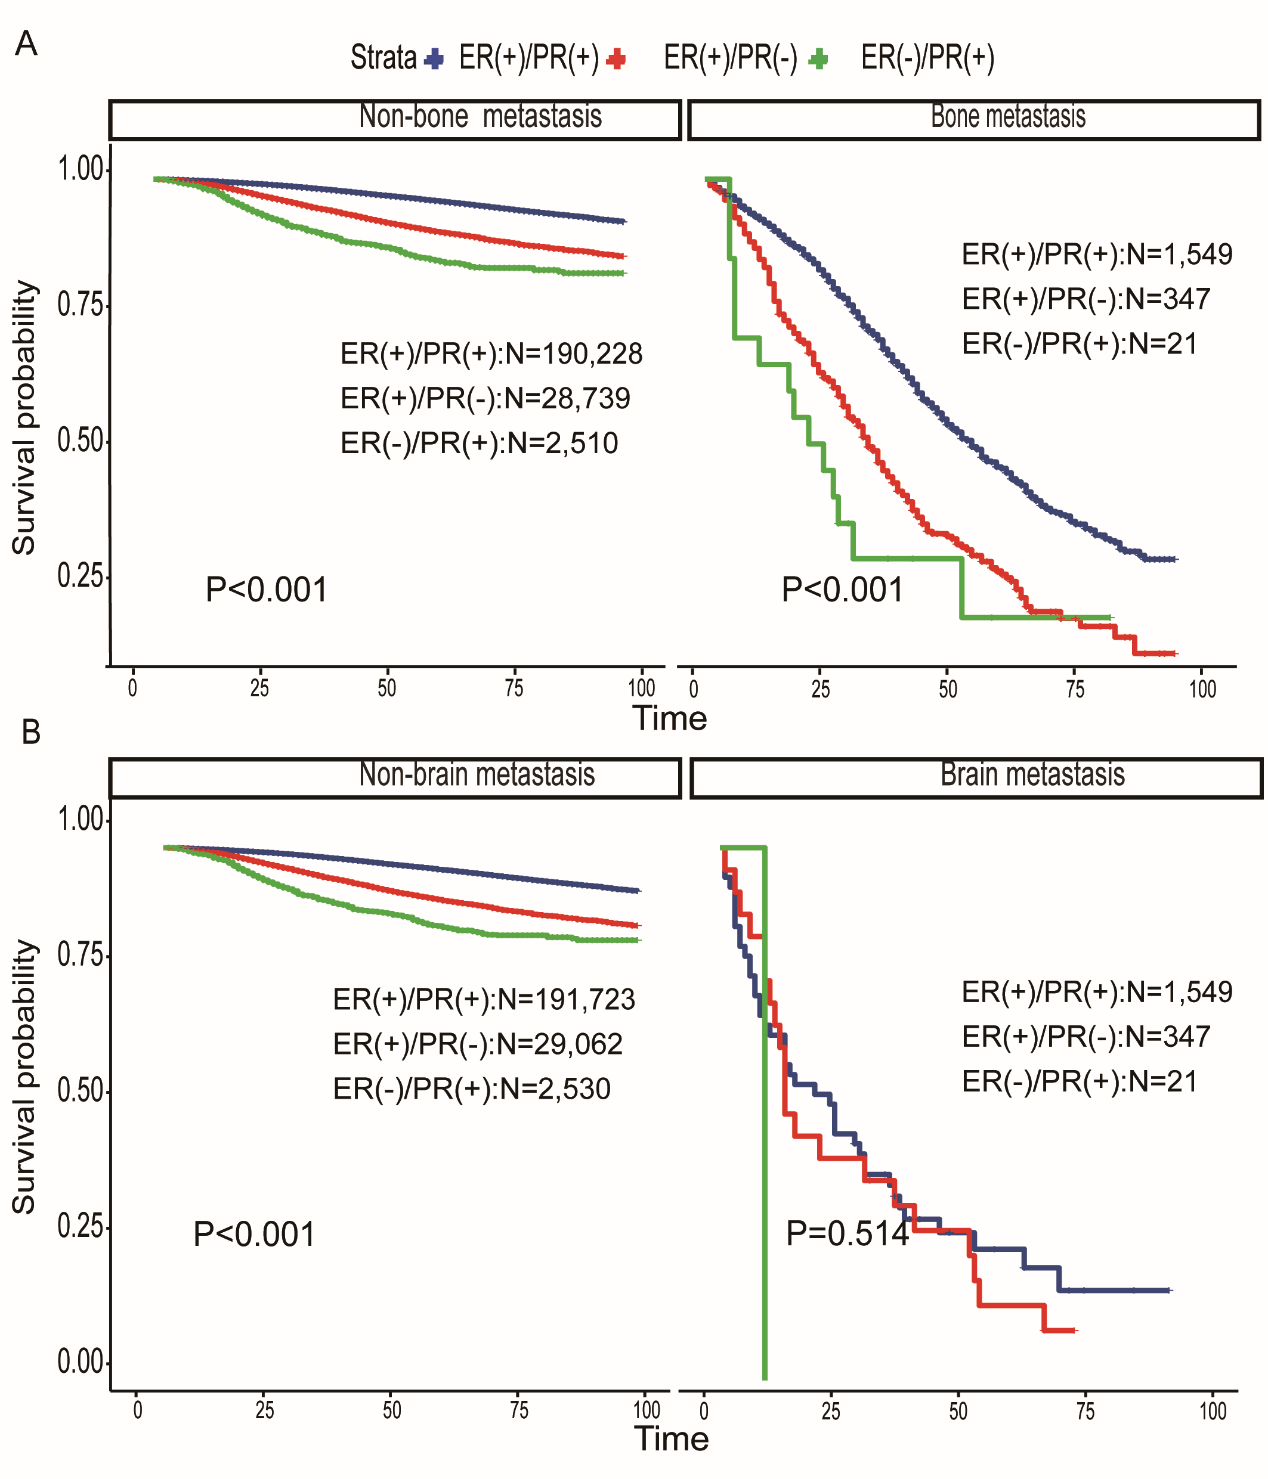


**Supplemental Figure S8.** BCSS stratified by bone metastasis and brain metastasis. BCSS of patients with HR-positive BC stratified by (**A**) Non-bone metastasis and with bone metastases; (**B**) Non-brain metastasis and with brain metastases.


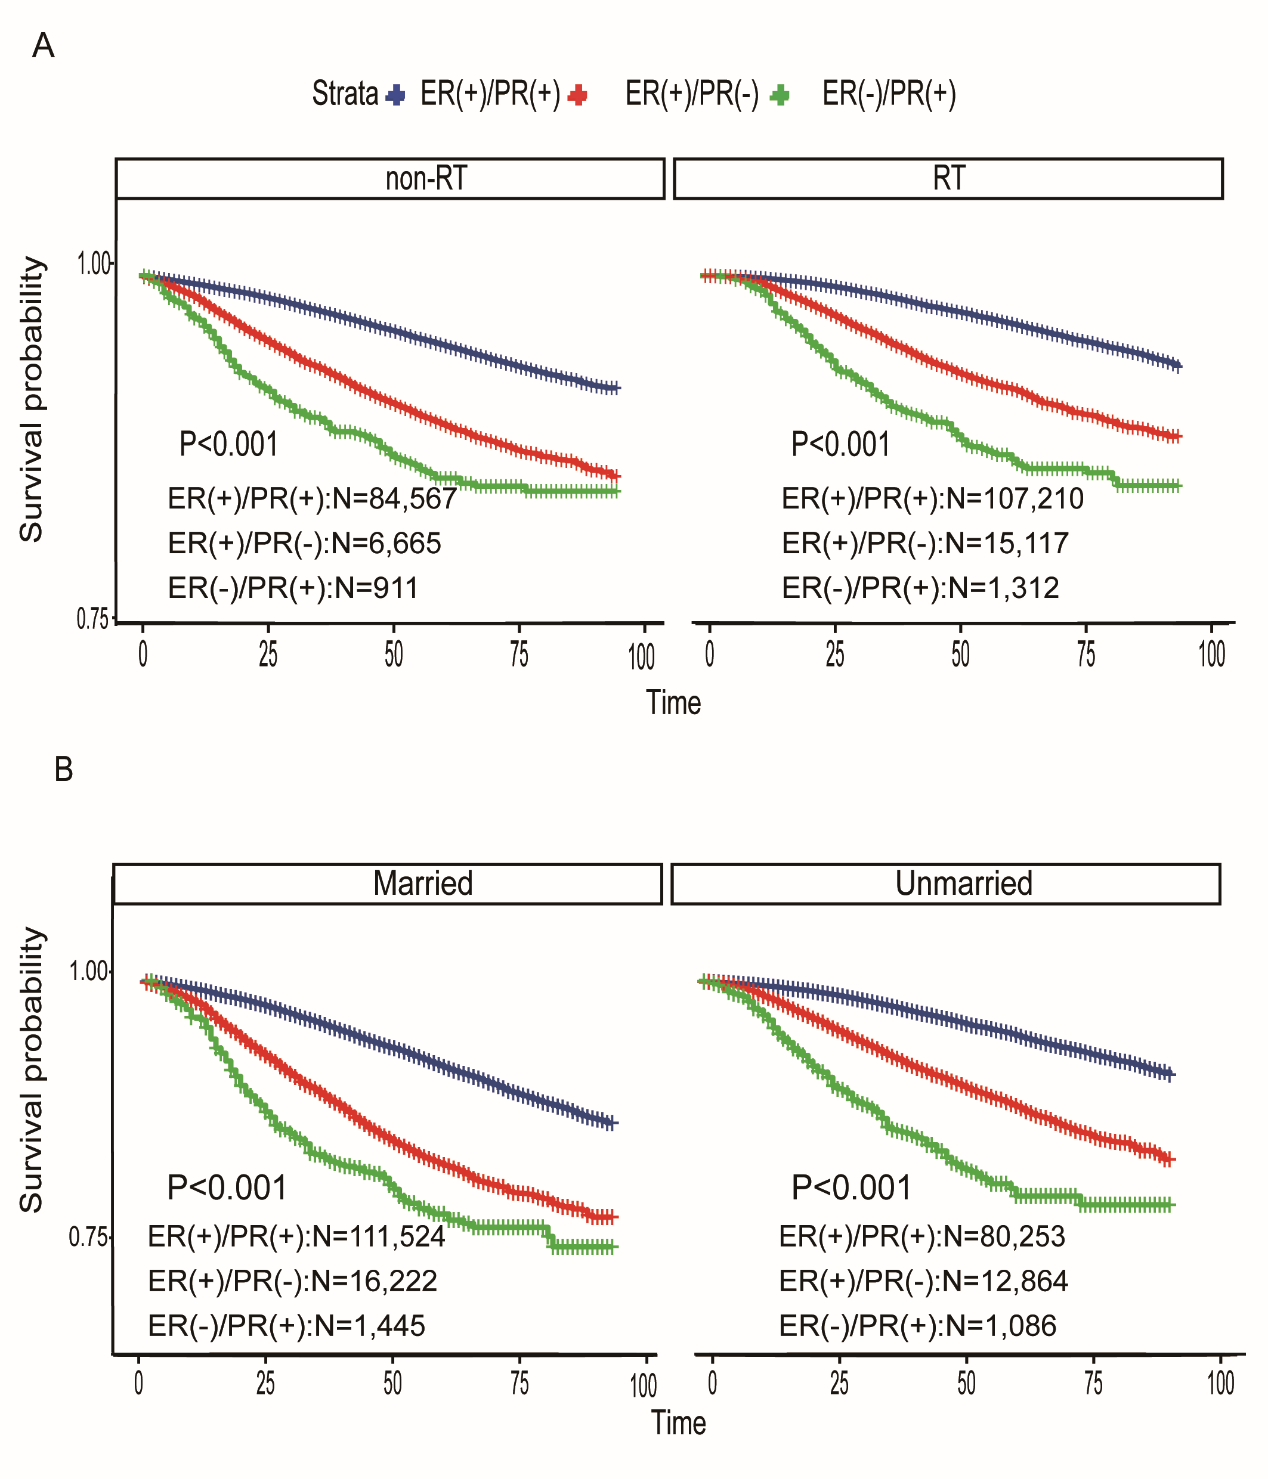


**Supplemental Figure S9.** BCSS stratified by Radiation Therapy and Marital status. BCSS of patients with HR-positive BC stratified by (**A**) non-radiation therapy and with Radiation Therapy; (**B**) Married and Unmarried.


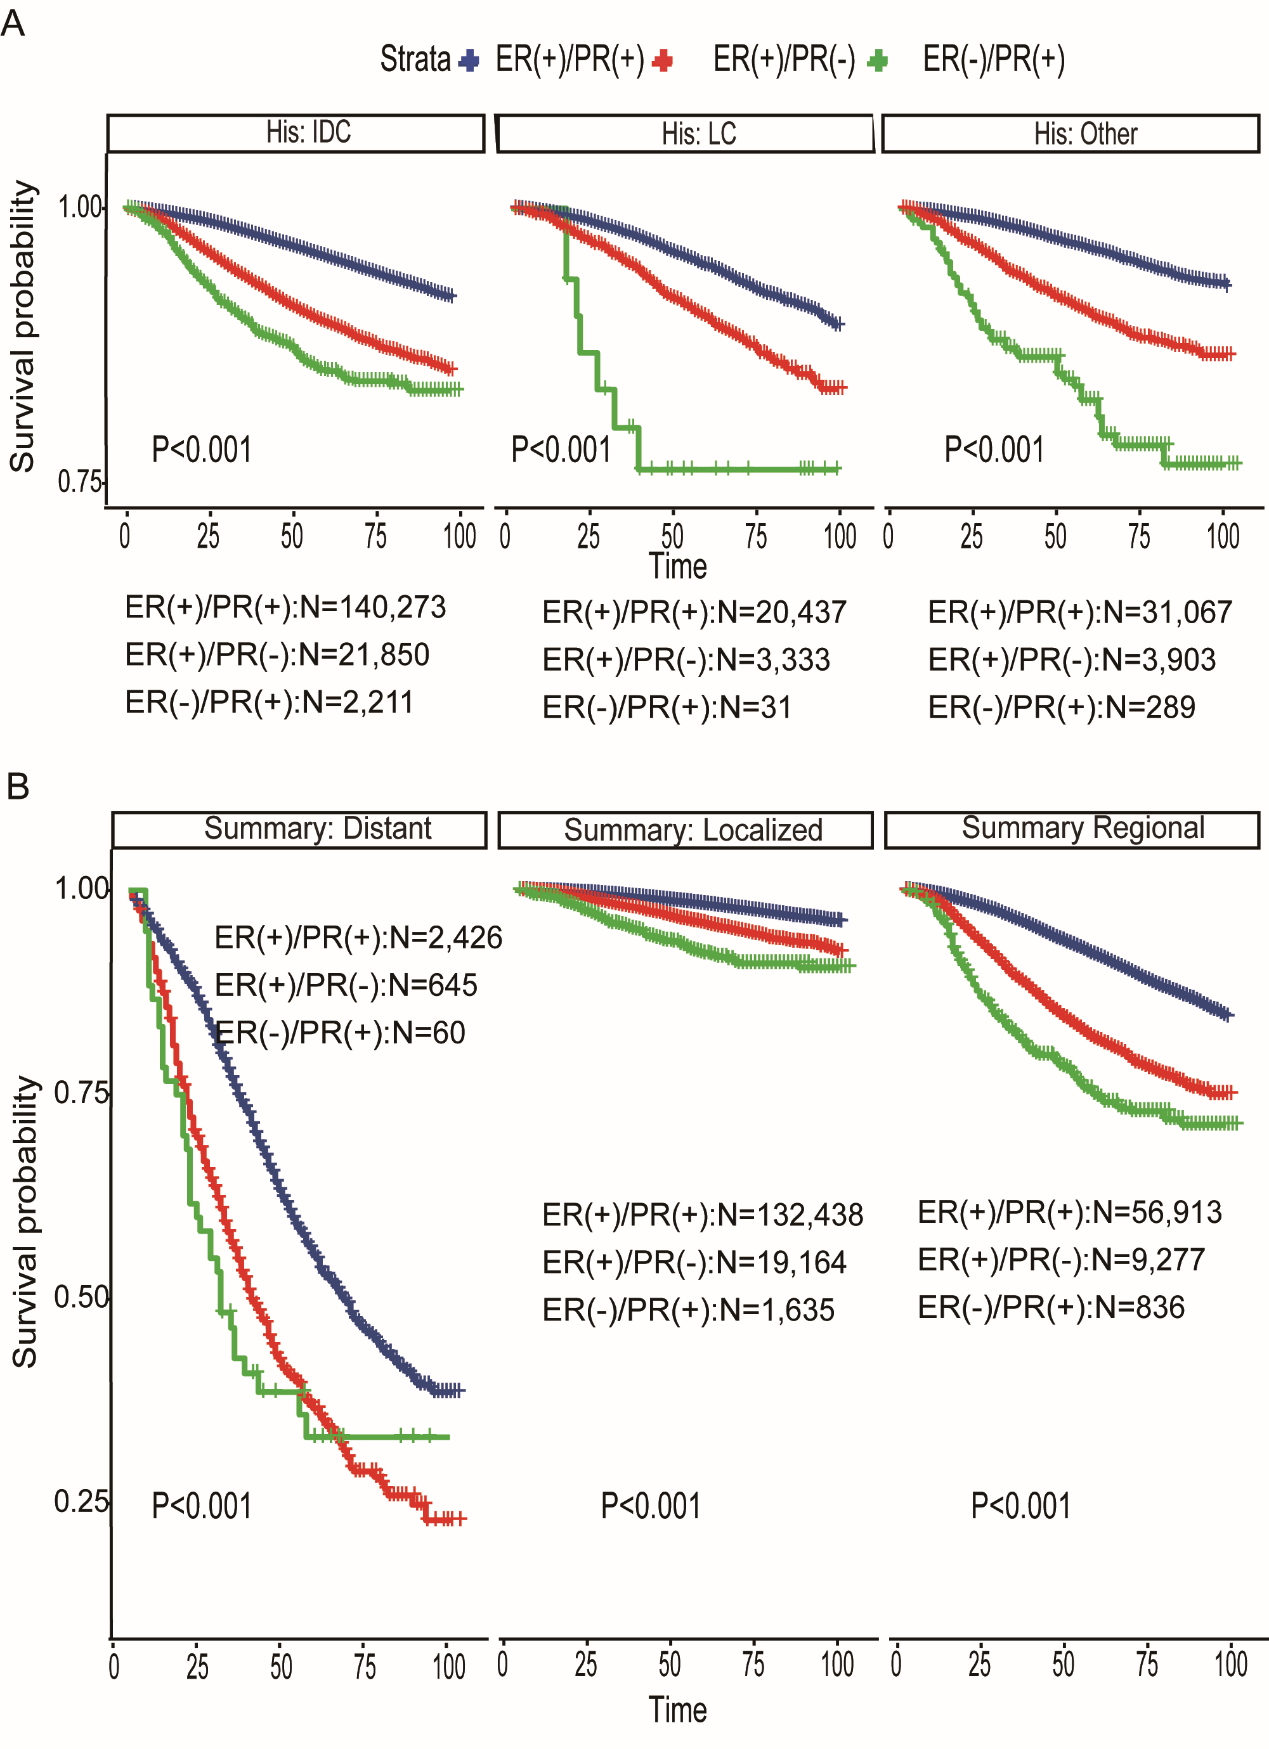


**Supplemental Figure S10.** BCSS stratified by histology and Tumor stage. BCSS of patients with HR positive BC stratified by (**A**) IDC, LC and Other; (**B**) Distant, Localized and Regional. IDC: Invasive ductal carcinoma; LC: lobular carcinoma.


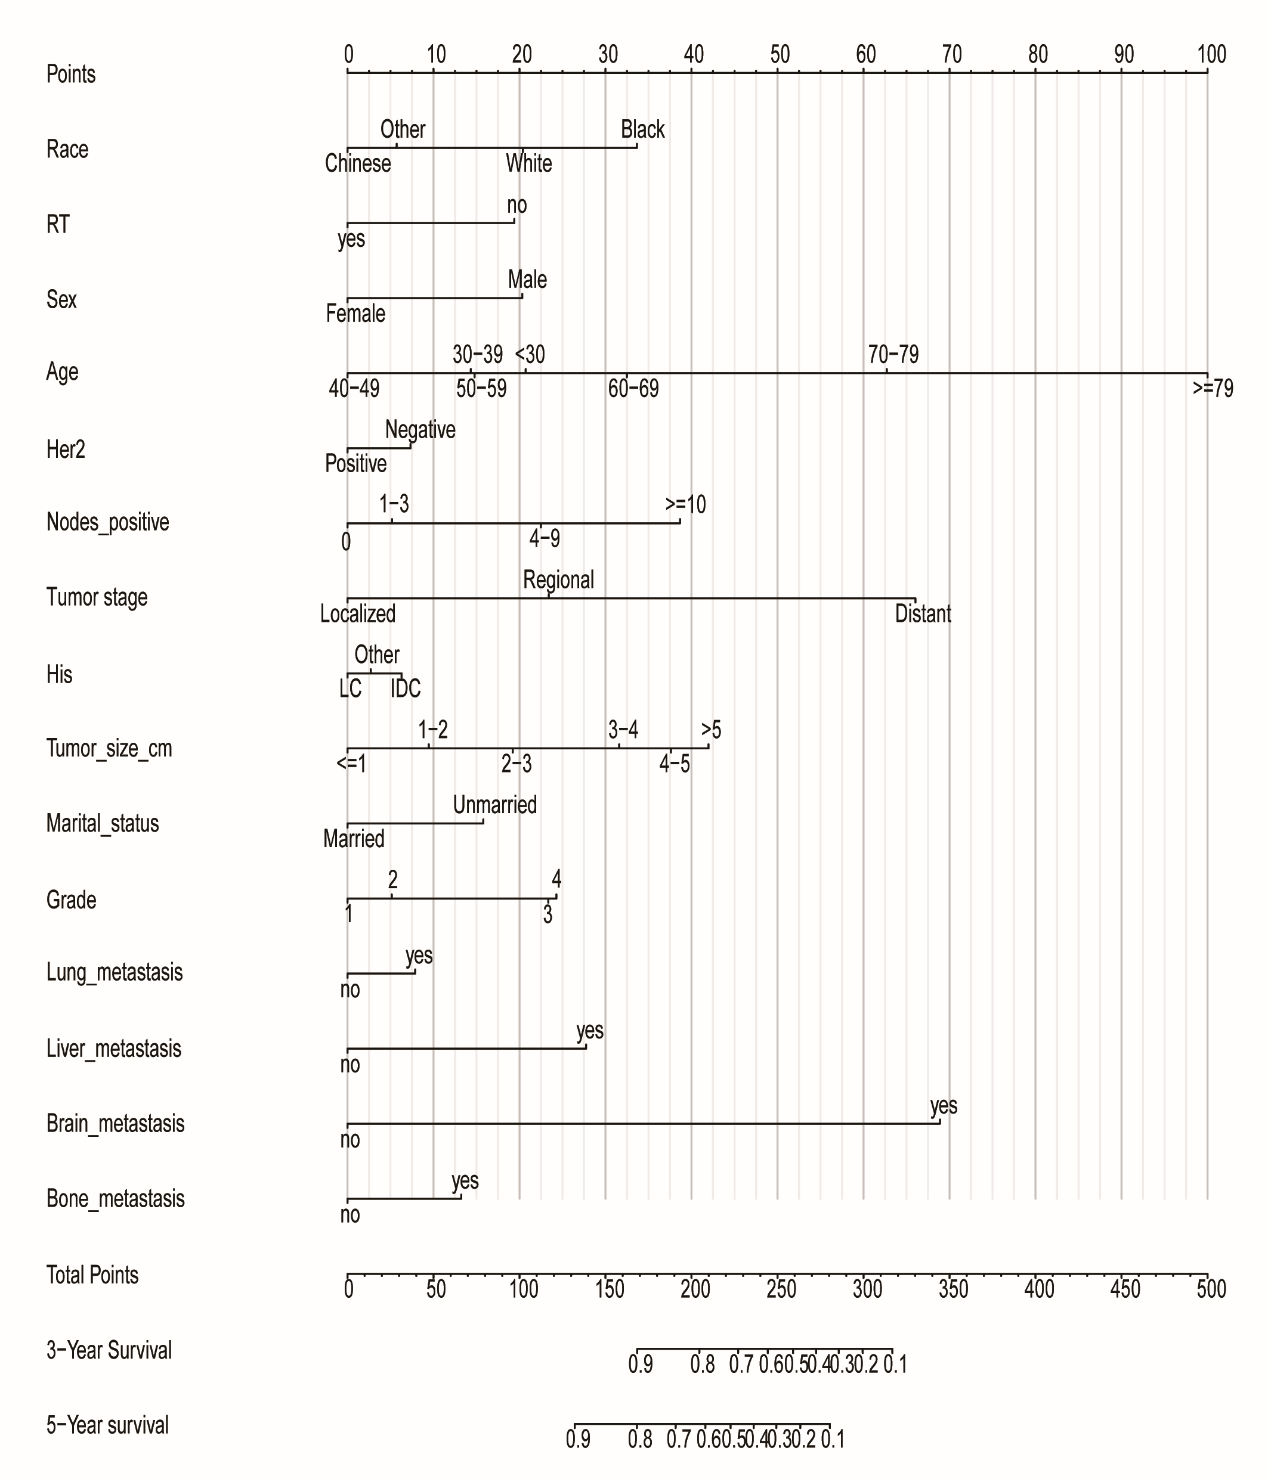


**Supplemental Figure S11.** The nomogram containing various factors for the 3‑, 5‑year HR-positive BC OS. RT, radiation therapy; Her2, human epidermal growth factor receptor 2; His, histology; IDC, invasive ductal carcinoma; LC, lobular carcinoma.


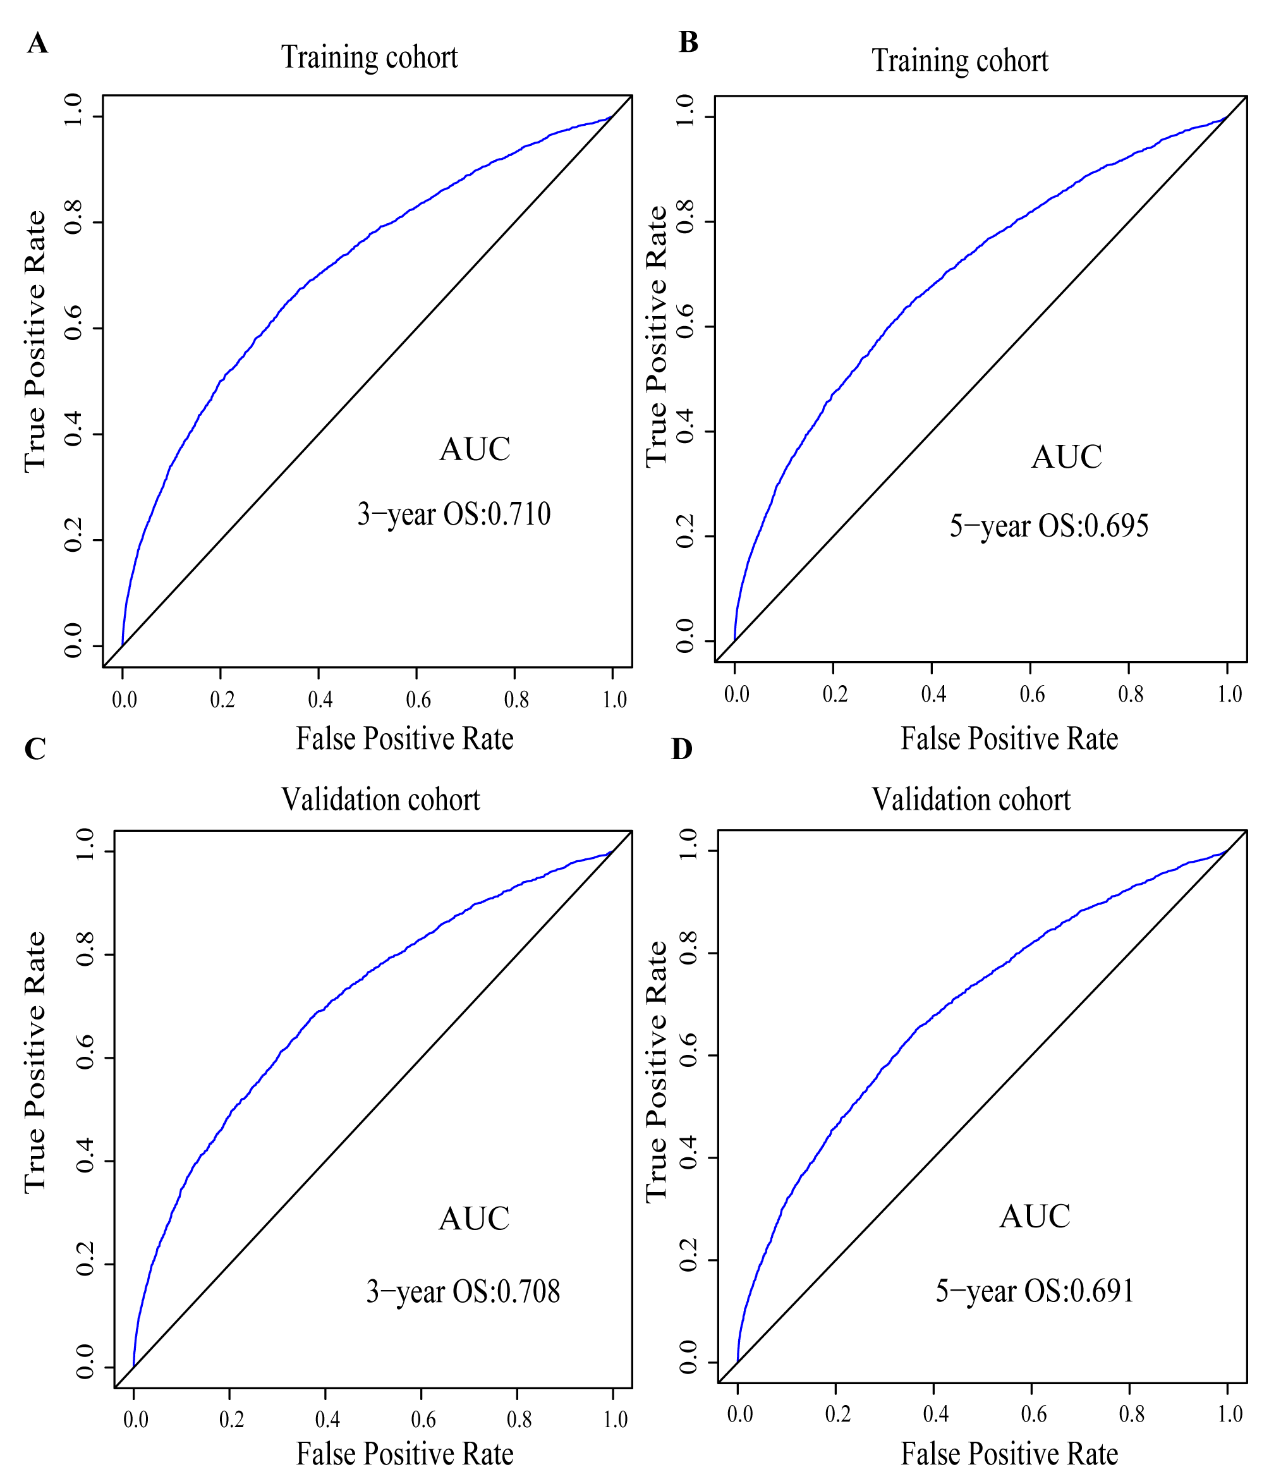


**Supplemental Figure S12.** ROC curves to predict 3- and 5-year OS. (**A**) 3-year OS in the training cohort; (**B**) 5-year OS in the training cohort; (**C**) 3-year OS in the validation cohort; (**D**) 5-year OS in the validation cohort. AUC, area under the curve; OS, overall survival.


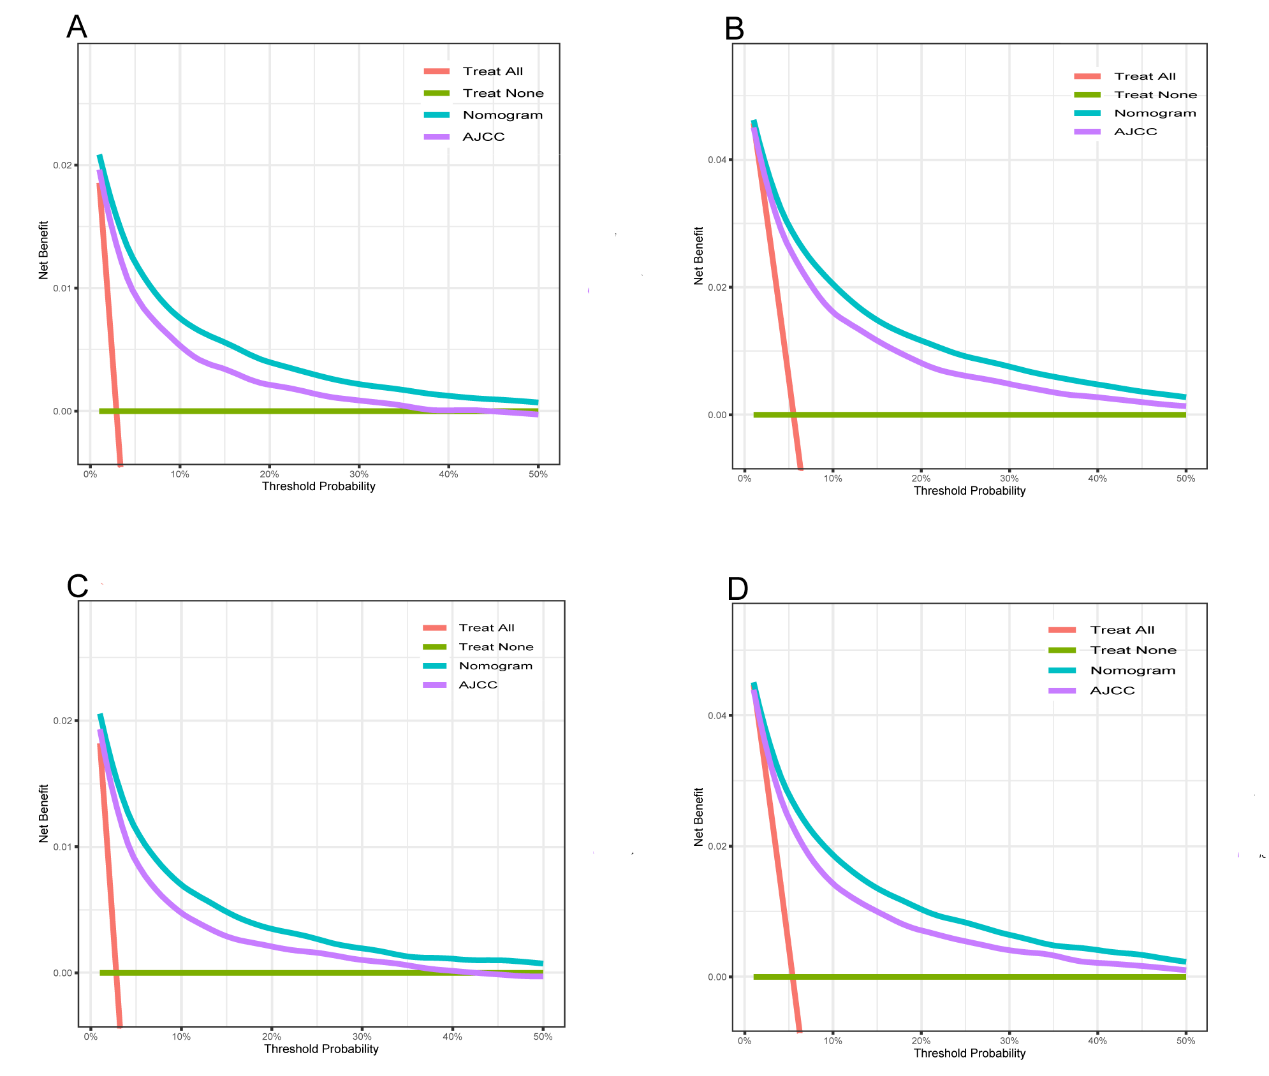


**Supplemental Figure S13.** DCA of the 3- and 5-year HR-positive BC OS comparing the nomogram with AJCC(TNM) anatomical stage in the training and validation cohort. (**A**) 3-year OS in the training cohort; (**B**) 5-year OS in the training cohort; (**C**) 3-year OS in the validation cohort; (**D**) 5-year OS in the validation cohort.


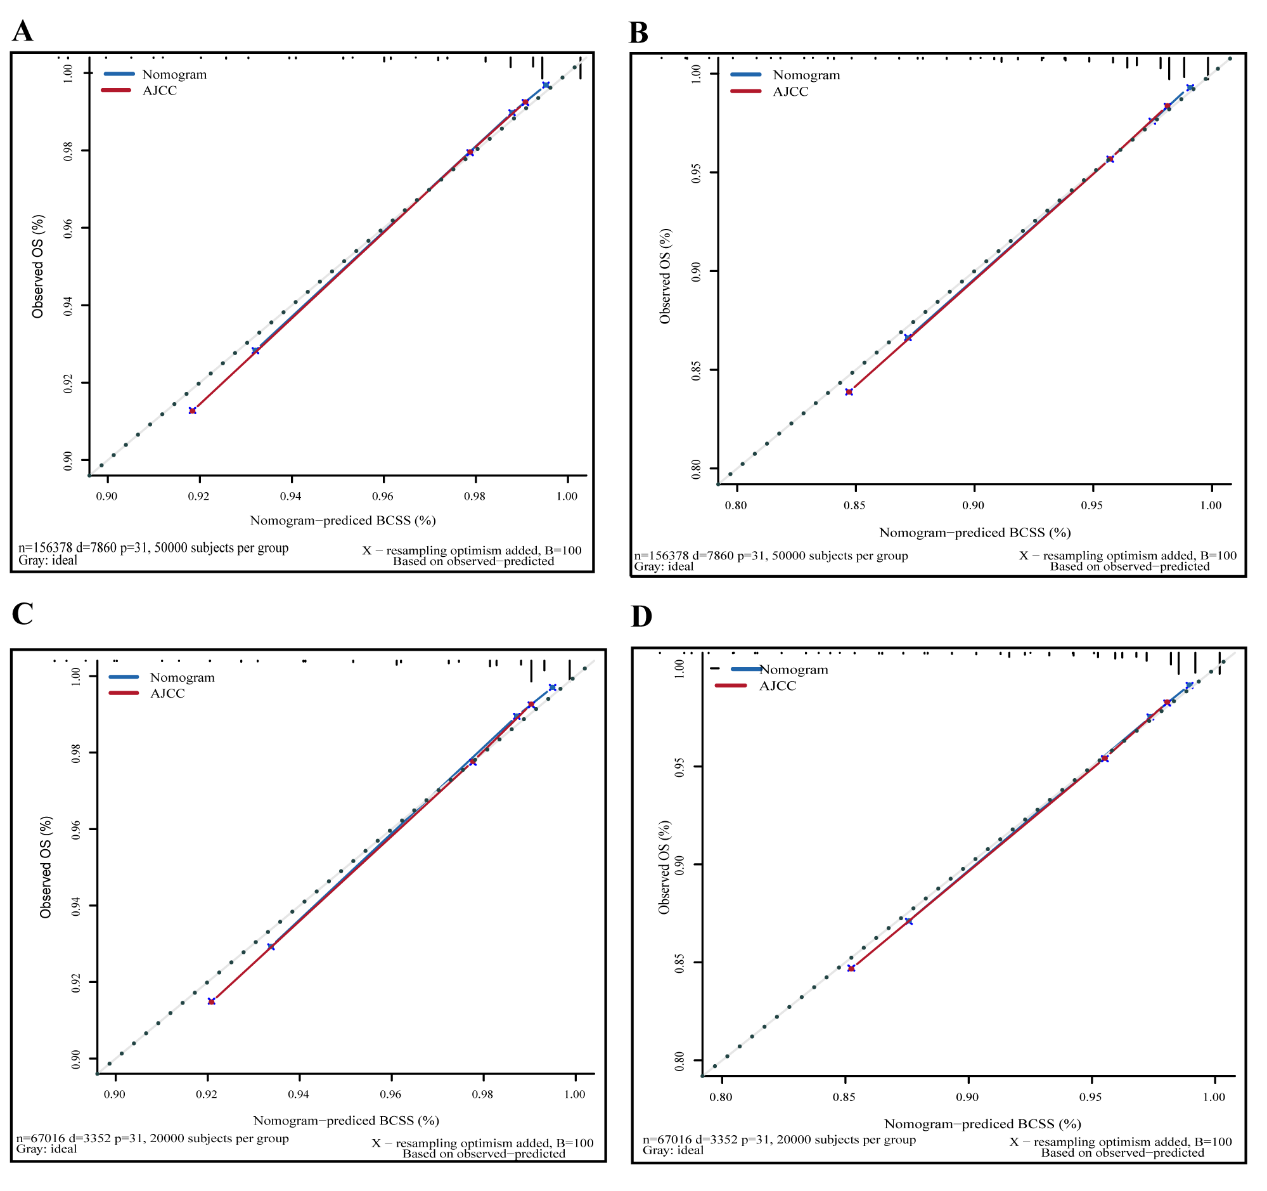


**Supplemental Figure S14.** Calibration plots of the 3- and 5- year BCSS comparing the nomogram with AJCC(TNM) anatomical staging in the training and validation cohort. (**A**) 3-year BCSS in the training cohort; (**B**) 5-year BCSS in the training cohort; (**C**) 3-year BCSS in the validation cohort; (**D**) 5-year BCSS in the validation cohort.


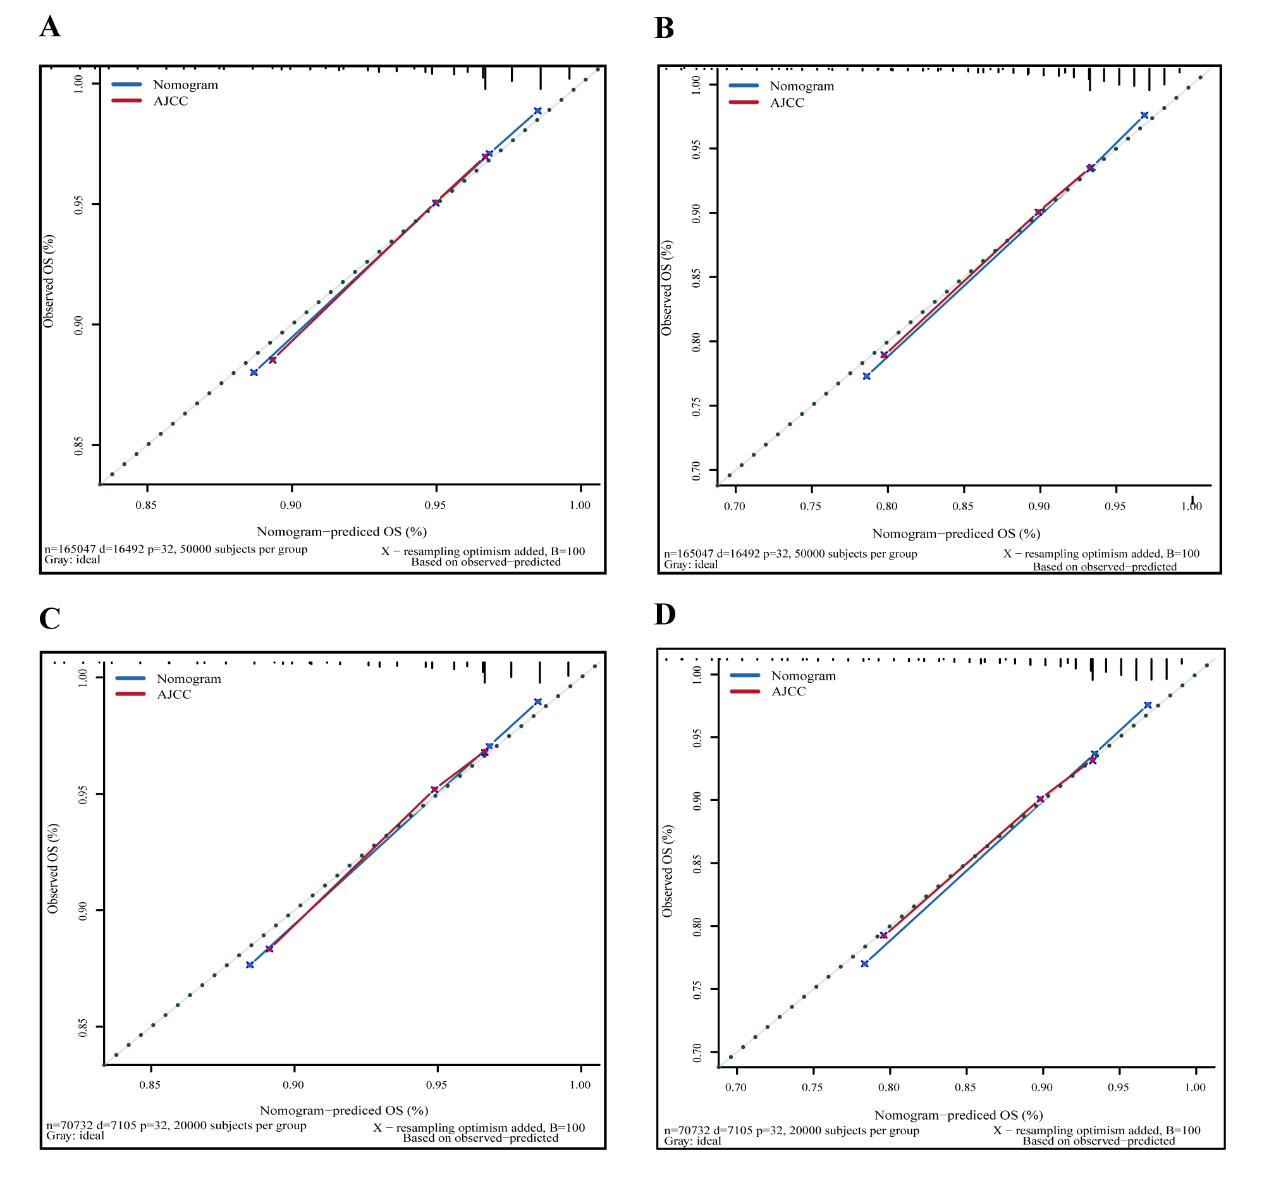


**Supplemental Figure S15.** Calibration plot of the 3- and 5-year HR-positive BC OS comparing the nomogram with AJCC(TNM) anatomical stage in the training and validation cohort. (**A**) 3-year OS in the training cohort; (**B**) 5-year OS in the training cohort; (**C**) 3-year OS in the validation cohort; (**D**) 5-year OS in the validation cohort.


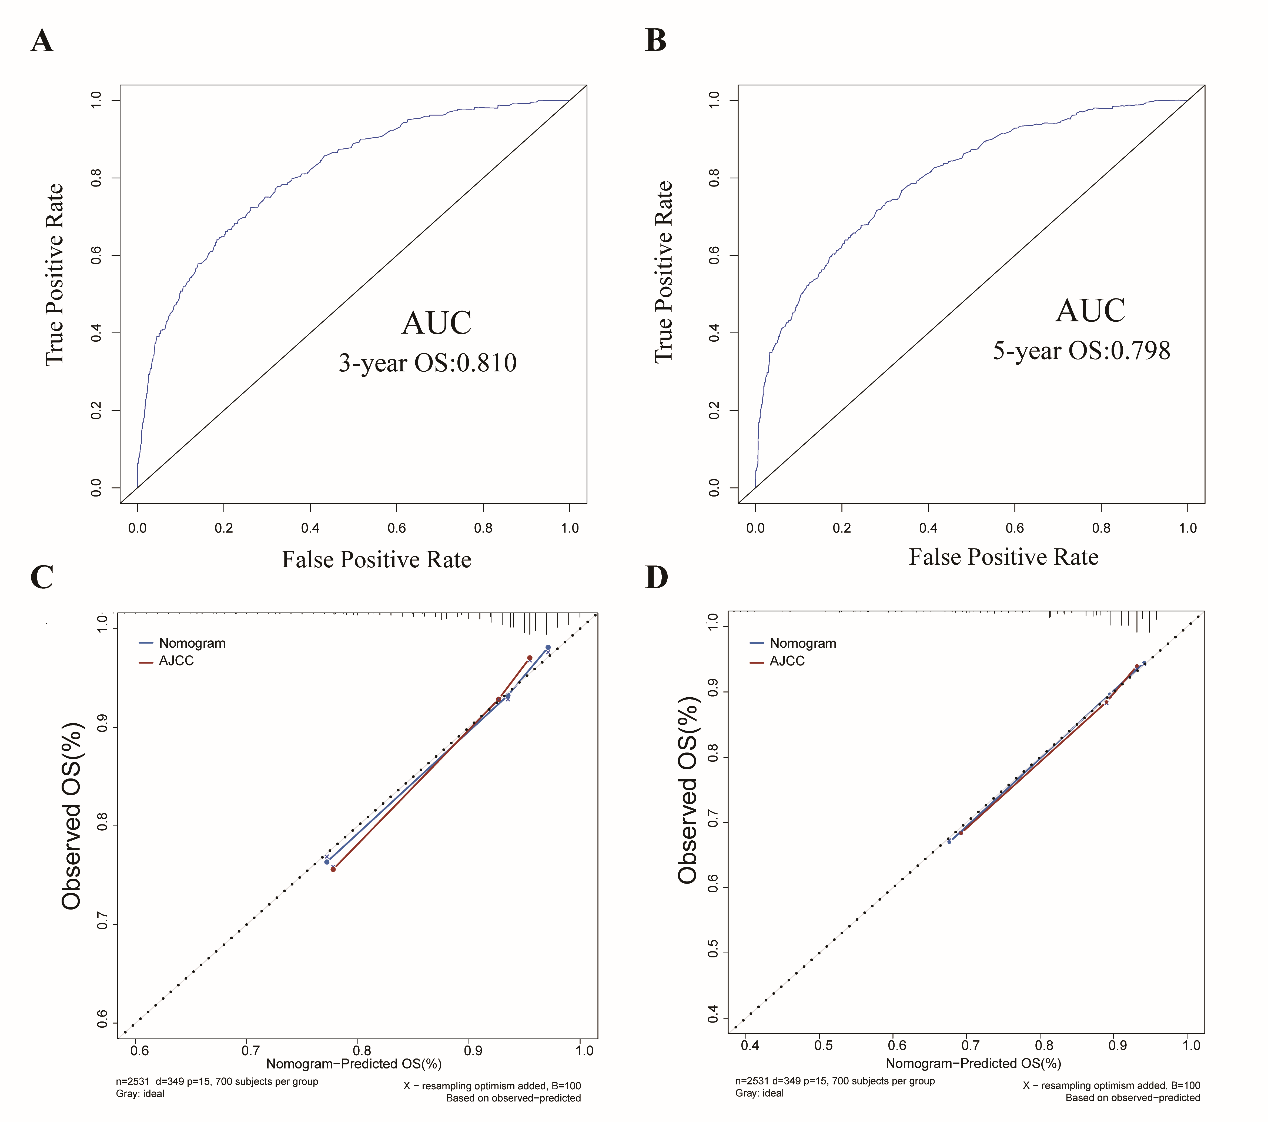


**Supplemental Figure S16.** Validation of the applicability and reliability of the nomogram in single ER-positive BC patients. (**A-B**) ROC curves to predict 3- and 5-year OS in ER-positive BC; (**C-D**) Calibration plots of the 3- and 5- year OS comparing the nomogram with AJCC(TNM) anatomical staging in the ER-positive BC cohort. AUC, area under the curve; OS, overall survival.


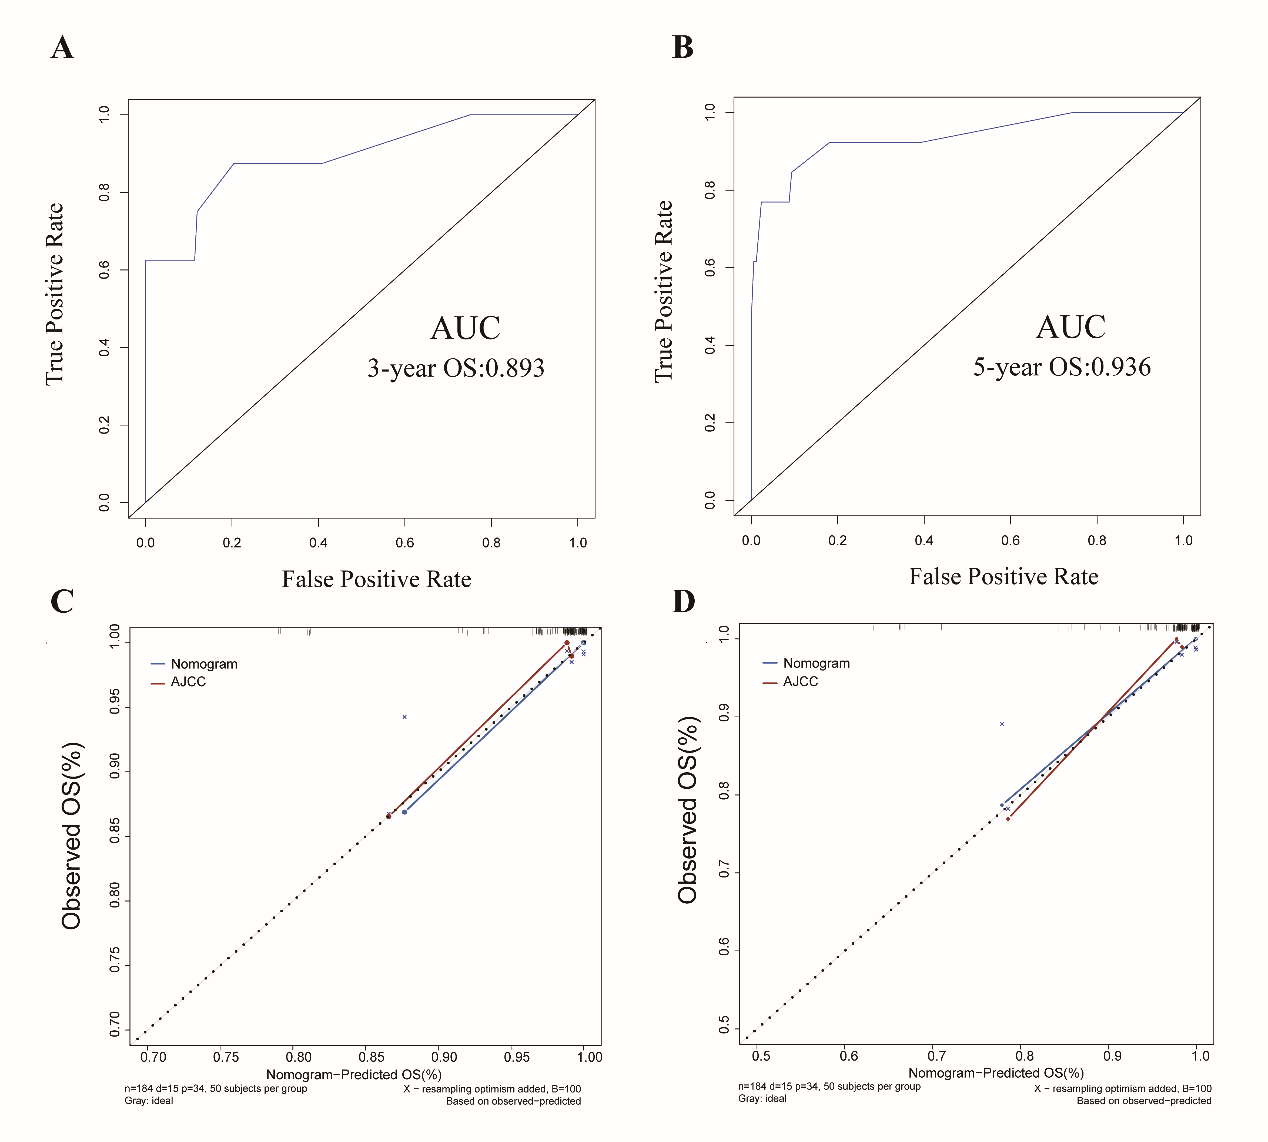


**Supplemental Figure S17.** Validation of the applicability and reliability of the nomogram in IDC BC patients. (**A-B**) ROC curves to predict 3- and 5-year OS in the IDC BC; (**C-D**) Calibration plots of the 3- and 5- year OS comparing the nomogram with AJCC(TNM) anatomical staging in the IDC BC cohort. AUC, area under the curve; OS, overall survival.

SupplementalTable S1. Baseline demographic and clinical characteristics of HR-positive BC patients in the external validation cohort.

| Characteristics (CSS) | All | ER (+)/PR (+) | ER (-)/PR (+) | ER (+)/PR (-) | P-value |
| --- | --- | --- | --- | --- | --- |
| patients(n%) | (N=191) | (N=4) | (N=37) |
| Sex: |  |  |  |  | 0.933 |
| Female | 230 (99.1%) | 189 (99.0%) | 4 (100%) | 37 (100%) |  |
| Male | 2 (0.9%) | 2 (1.0%) | 0 (0%) | 0 (0%) |  |
| Grade: |  |  |  |  | 0.205 |
| I | 26(11.2%) | 25 (13.1%) | 0 (0%) | 1 (2.7%) |  |
| II | 171(73.7%) | 141(73.8%) | 4 (100%) | 26 (70.3%) |  |
| III | 35 (15.1%) | 25 (13.1%) | 0 (0%) | 10 (27.0%) |  |
| IV | 0 (0.00%) | 0 (0.00%) | 0 (0.00) | 0 (0.00%) |  |
| RT: |  |  |  |  | 0.666 |
| no | 122(52.6%) | 104(54.5%) | 2 (50.0%) | 16 (43.2%) |  |
| yes | 110(47.4%) | 87 (45.5%) | 2 (50.0%) | 21 (56.8%) |  |
| Age: |  |  |  |  | 0.350 |
| <30 | 4 (1.7%) | 4 (2.1%) | 0 (0%) | 0 (0%) |  |
| >=79 | 0 (0.00%) | 0 (0.00%) | 0 (0.00) | 0 (0.00%) |  |
| 30-39 | 22 (9.5%) | 21 (11.0%) | 1 (25.0%) | 0 (0%) |  |
| 40-49 | 106(45.7%) | 91 (47.6%) | 0 (0%) | 15 (40.5%) |  |
| 50-59 | 54 (23.3%) | 39 (20.4%) | 3 (75.0%) | 12 (32.4%) |  |
| 60-69 | 32 (13.8%) | 25 (13.1%) | 0 (0%) | 7 (18.9%) |  |
| 70-79 | 14 (6.0%) | 11 (5.8%) | 0 (0%) | 3 (8.1%) |  |
| T: |  |  |  |  | 0.355 |
| T1 | 70 (30.2%) | 59 (30.9%) | 3 (75.0%) | 8 (21.6%) |  |
| T2 | 144(62.1%) | 119(62.3%) | 1 (25.0%) | 24 (64.9%) |  |
| T3 | 18 (7.8%) | 13 (6.8%) | 0 (0%) | 5 (13.5%) |  |
| T4 | 0 (0.00%) | 0 (0.00%) | 0 (0.00) | 0 (0.00%) |  |
| N: |  |  |  |  | 0.575 |
| N0 | 108(46.6%) | 91 (47.6%) | 3 (75.0%) | 14 (37.8%) |  |
| N1 | 65 (28.0%) | 53 (27.7%) | 1 (25.0%) | 11 (29.7%) |  |
| N2 | 34 (14.7%) | 30 (15.7%) | 0 (0%) | 4 (10.8%) |  |
| N3 | 25 (10.8%) | 17 (8.9%) | 0 (0%) | 8 (21.6%) |  |
| M: |  |  |  |  | 0.450 |
| M0 | 210(90.5%) | 175(91.6%) | 4 (100%) | 31 (83.8%) |  |
| M1 | 22 (9.5%) | 16 (8.4%) | 0 (0%) | 6 (16.2%) |  |
| Laterality: |  |  |  |  | 0.884 |
| Bilaterral | 229(98.7%) | 188(98.4%) | 4 (100%) | 37 (100%) |  |
| One side | 3 (1.3%) | 3 (1.6%) | 0 (0%) | 0 (0%) |  |
| Primary_Site |  |  |  |  | 0.435 |
| Uo | 91 (39.2%) | 72 (37.7%) | 2 (50.0%) | 17 (45.9%) |  |
| Lo | 26 (11.2%) | 21 (11.0%) | 0 (0%) | 5 (13.5%) |  |
| Ui | 52 (22.4%) | 46 (24.1%) | 1 (25.0%) | 5 (13.5%) |  |
| Li | 13 (5.6%) | 11 (5.8%) | 1 (25.0%) | 1 (2.7%) |  |
| central | 19 (8.2%) | 12 (6.3%) | 0 (0%) | 7 (18.9%) |  |
| other | 31 (13.4%) | 29 (15.2%) | 0 (0%) | 2 (5.4%) |  |
| Her2: |  |  |  |  | 0.561 |
| postive | 172(74.1%) | 141(73.8%) | 2 (50.0%) | 29 (78.4%) |  |
| negative | 60 (25.9%) | 50 (26.2%) | 2 (50.0%) | 8 (21.6%) |  |
| Ki-67: |  |  |  |  | 0.415 |
| ＜14% | 61 (26.3%) | 54 (28.3%) | 0 (0%) | 7 (18.9%) |  |
| >=14% | 171(73.7%) | 137(71.7%) | 4 (100%) | 30 (81.1%) |  |
| node_positive: |  |  |  |  | 0.235 |
| 0 | 110(47.4%) | 93 (48.7%) | 3 (75.0%) | 14 (37.8%) |  |
| 1-3 | 63 (27.2%) | 51 (26.7%) | 1 (25.0%) | 11 (29.7%) |  |
| 4-9 | 34 (14.7%) | 30 (15.7%) | 0 (0%) | 4 (10.8%) |  |
| ＞＝10 | 25 (10.8%) | 17 (8.9%) | 0 (0%) | 8 (21.6%) |  |
| seer: |  |  |  |  | 0.595 |
| Localized | 106(45.7%) | 90 (47.1%) | 3 (75.0%) | 13 (35.1%) |  |
| Regional | 104(44.8%) | 85 (44.5%) | 1 (25.0%) | 18 (48.6%) |  |
| Distant | 22 (9.5%) | 16 (8.4%) | 0 (0%) | 6 (16.2%) |  |
| His: |  |  |  |  | 0.617 |
| IDC | 184(79.3%) | 152(79.6%) | 3 (75.0%) | 29 (78.4%) |  |
| LC | 11 (4.7%) | 7 (3.7%) | 0 (0%) | 4 (10.8%) |  |
| other | 37 (15.9%) | 32 (16.8%) | 1 (25.0%) | 4 (10.8%) |  |
| Tumor_size_cm: |  |  |  |  | 0.753 |
| ＜＝1 | 9 (3.9%) | 9 (4.7%) | 0 (0%) | 0 (0%) |  |
| 1-2 | 61 (26.3%) | 50 (26.2%) | 3 (75.0%) | 8 (21.6%) |  |
| 2-3 | 78 (33.6%) | 63 (33.0%) | 0 (0%) | 15 (40.5%) |  |
| 3-4 | 45 (19.4%) | 37 (19.4%) | 1 (25.0%) | 7 (18.9%) |  |
| 4-5 | 21 (9.1%) | 19 (9.9%) | 0 (0%) | 2 (5.4%) |  |
| ＞5 | 18 (7.8%) | 13 (6.8%) | 0 (0%) | 5 (13.5%) |  |
| Marital_status: |  |  |  |  | 0.975 |
| Married | 231(99.6%) | 190(99.5%) | 4 (100%) | 37 (100%) |  |
| unmarried | 1 (0.4%) | 1 (0.5%) | 0 (0%) | 0 (0%) |  |
| Lung_metastasis |  |  |  |  | 0.813 |
| no | 225(97.0%) | 186(97.4%) | 4 (100%) | 35 (94.6%) |  |
| yes | 7 (3.0%) | 5 (2.6%) | 0 (0%) | 2 (5.4%) |  |
| Liver_metastasis |  |  |  |  | 0.012 |
| no | 223(96.1%) | 187(97.9%) | 4 (100%) | 32 (86.5%) |  |
| yes | 9 (3.9%) | 4 (2.1%) | 0 (0%) | 5 (13.5%) |  |
| Brain_metastasis |  |  |  |  | 0.120 |
| no | 229(98.7%) | 190(99.5%) | 4 (100%) | 35 (94.6%) |  |
| yes | 3 (1.3%) | 1 (0.5%) | 0 (0%) | 2 (5.4%) |  |
| Bone_metastasis |  |  |  |  | 0.847 |
| no | 220(94.8%) | 180(94.2%) | 4 (100%) | 36 (97.3%) |  |
| yes | 12 (5.2%) | 11 (5.8%) | 0 (0%) | 1 (2.7%) |  |

BC, breast cancer; HR, hormone receptor; ER, estrogen receptor; PR, progesterone receptor; RT, radiation therapy; Her2, human epidermal growth factor receptor 2; His, histology; IDC, invasive ductal carcinoma; LC, lobular carcinoma.

Supplemental Table S2. Adjuvant treatment status of 232 patients in the external independent validation cohort.

| **Treatment options** | **Number of cases** |
| --- | --- |
| Radiation therapy | 110 |
| ACT | 79 |
| ECT | 26 |
| TC | 21 |
| AC | 14 |
| CAF | 13 |
| AC-TH | 10 |
| ECFT | 7 |
| CAFT | 6 |
| ECTH | 5 |
| ECF | 4 |
| AC-P | 2 |
| EC | 2 |
| AC-PH | 1 |
| EC-wP | 1 |
| CATH | 1 |
| CAFH | 1 |
| AI | 44 |
| AI+OFS | 15 |
| TAM | 35 |
| Endocrine therapy (unspecified) | 9 |
| OFS+TAM+AI | 13 |
| OFS+TAM | 20 |

A, Doxorubicin; C, Cyclophosphamide; E, Epirubicin; P, Paclitaxel; F, Fluorouracil; T, Docetaxel; H, Trastuzumab; AI, Letrozole; OFS, Leuprorelin; TAM, Tamoxifen

Supplemental Table S3. Correlation between high (＞20%) and low (≤20%) Ki67 expression groups and other clinical factors.

| Characteristics | Ki67≤20% | Ki67>20% | P-value |
| --- | --- | --- | --- |
| (n = 97) | (n = 135) |
| Sex: |  |  | 0.174 |
| Female | 95 | 135 |  |
| Male | 2 | 0 |  |
| Grade: |  |  | <0.001 |
| I | 20 | 6 |  |
| II | 72 | 99 |  |
| III | 5 | 30 |  |
| RT: |  |  | 0.084 |
| no | 58 | 64 |  |
| yes | 39 | 71 |  |
| Age: |  |  | 0.195 |
| <30 | 2 | 2 |  |
| 30-39 | 6 | 16 |  |
| 40-49 | 39 | 67 |  |
| 50-59 | 24 | 30 |  |
| 60-69 | 18 | 14 |  |
| 70-79 | 8 | 6 |  |
| T: |  |  | 0.223 |
| T1 | 34 | 36 |  |
| T2 | 58 | 86 |  |
| T3 | 5 | 13 |  |
| N: |  |  | 0.111 |
| N0 | 53 | 55 |  |
| N1 | 20 | 45 |  |
| N2 | 15 | 19 |  |
| N3 | 9 | 16 |  |
| M: |  |  | 0.009 |
| M0 | 94 | 116 |  |
| M1 | 3 | 19 |  |
| Laterality: |  |  | 0.374, |
| Bilaterral | 0 | 3 |  |
| One side | 97 | 132 |  |
| Primary_Site |  |  | 0.018 |
| Central | 7 | 12 |  |
| Li | 4 | 9 |  |
| Lo | 17 | 9 |  |
| Other | 9 | 22 |  |
| Ui | 28 | 24 |  |
| Uo | 32 | 59 |  |
| ER: |  |  | 0.231 |
| Negative | 0 | 4 |  |
| Positive | 97 | 131 |  |
| PR: |  |  | 0.280 |
| Negative | 12 | 25 |  |
| Positive | 85 | 110 |  |
| Her2: |  |  | 0.630 |
| Negative | 23 | 37 |  |
| Positive | 74 | 98 |  |
| node_positive: |  |  | 0.111 |
| 0 | 53 | 55 |  |
| >=10 | 9 | 16 |  |
| 1-3 | 20 | 45 |  |
| 4-9 | 15 | 19 |  |
| seer: |  |  | 0.008 |
| Distant | 3 | 19 |  |
| Localized | 52 | 54 |  |
| Regional | 42 | 62 |  |
| His: |  |  | 0.031 |
| IDC | 69 | 115 |  |
| LC | 7 | 4 |  |
| Other | 21 | 16 |  |
| Tumor_size_cm: |  |  | 0.077 |
| >5 | 5 | 3 |  |
| <=1 | 6 | 13 |  |
| 1-2 | 28 | 33 |  |
| 2-3 | 30 | 48 |  |
| 3-4 | 24 | 21 |  |
| 4-5 | 4 | 17 |  |
| Marital_status: |  |  | 0.048 |
| Married | 96 | 135 |  |
| Unmarried | 1 | 0 |  |
| Lung_metastasis |  |  | 0.059 |
| no | 97 | 128 |  |
| yes | 0 | 7 |  |
| Liver_metastasis |  |  | 0.384 |
| no | 95 | 128 |  |
| yes | 2 | 7 |  |
| Brain_metastasis |  |  | 1 |
| no | 96 | 133 |  |
| yes | 1 | 2 |  |
| Bone_metastasis |  |  | 0.130 |
| no | 95 | 125 |  |
| yes | 2 | 10 |  |

HR, hormone receptor; ER, estrogen receptor; PR, progesterone receptor; RT, radiation therapy; Her2, human epidermal growth factor receptor 2;His, histology; IDC, invasive ductal carcinoma; LC, lobular carcinoma; Li, lower inner; Lo, lower outer;Ui; upper inner; Uo, upper outer

Supplemental Table S4. Baseline demographic and clinical characteristics of HR-positive BC patients in the seer and external validation cohort.

| Characteristics (CSS) | Chinese dataset | SEER dataset | P-value |
| --- | --- | --- | --- |
| (n = 232) | (n = 11,414) |
| Race: |  |  | <0.001 |
| Black | 0 (0.00%) | 20353(9.11%) |  |
| Chinese | 232 (100.00%) | 3532(1.58%) |  |
| Other | 0 (0.00%) | 19031(8.52%) |  |
| White | 0 (0.00%) | 180478(80.79%) |  |
| Sex: |  |  | 0.889 |
| Female | 230 (99.14%) | 221667(99.23%) |  |
| Male | 2 (0.86%) | 1727(0.77%) |  |
| Grade: |  |  | <0.001 |
| I | 16 (6.90%) | 61553(27.55%) |  |
| II | 136 (58.62%) | 109737(49.12%) |  |
| III | 23 (9.91%) | 51738(23.16%) |  |
| IV | 0 (0.00%) | 366(0.16%) |  |
| RT: |  |  | 0.084 |
| no | 110 (47.41%) | 99755(44.65%) |  |
| yes | 122 (52.59%) | 123639(55.35%) |  |
| Age: |  |  | <0.001 |
| <30 | 4 (1.72%) | 979(0.44%) |  |
| >=79 | 0 (0.00%) | 13814(6.18%) |  |
| 30-39 | 22 (9.48%) | 8534(3.82%) |  |
| 40-49 | 106 (45.69%) | 36750(16.45%) |  |
| 50-59 | 54 (23.28%) | 56407(25.25%) |  |
| 60-69 | 32 (13.79%) | 65678(29.40%) |  |
| 70-79 | 14 (6.03%) | 41232(18.46%) |  |
| T: |  |  | <0.001 |
| T1 | 70 (30.17%) | 145531(65.15%) |  |
| T2 | 144 (62.07%) | 62764(28.10%) |  |
| T3 | 18 (7.76%) | 11364(5.09%) |  |
| T4 | 0 (0.00%) | 3735(1.67%) |  |
| N: |  |  | <0.001 |
| N0 | 108 (46.55%) | 156021(69.84%) |  |
| N1 | 65 (28.02%) | 49857(22.32%) |  |
| N2 | 34 (14.66%) | 11391(5.10%) |  |
| N3 | 25 (10.78%) | 6125(2.74%) |  |
| M: |  |  | <0.001 |
| M0 | 210 (90.52%) | 220452(98.68%) |  |
| M1 | 22 (9.48%) | 2942(1.32%) |  |
| Laterality: |  |  | <0.001 |
| Bilaterral | 3 (1.29%) | 15(0.01%) |  |
| One side | 229 (98.71%) | 223379(99.99%) |  |
| Primary_Site |  |  | <0.001 |
| Central | 19 (8.19%) | 11201(5.01%) |  |
| Li | 13 (5.60%) | 12676(5.67%) |  |
| Lo | 26 (11.21%) | 17415(7.80%) |  |
| Other | 31 (13.36%) | 77160(34.54%) |  |
| Ui | 52 (22.41%) | 28718(12.86%) |  |
| Uo | 91 (39.22%) | 76224(34.12%) |  |
| Her2: |  |  | <0.001 |
| Negative | 60 (25.86%) | 196717(88.06%) |  |
| Positive | 172 (74.14%) | 26677(11.94%) |  |
| node_positive: |  |  | <0.001 |
| 0 | 108 (46.55%) | 157472(70.49%) |  |
| >=10 | 25 (10.78%) | 5606(2.51%) |  |
| 1-3 | 65 (28.02%) | 48209(21.58%) |  |
| 4-9 | 34 (14.66%) | 12107(5.42%) |  |
| seer: |  |  | <0.001 |
| Distant | 22 (9.48%) | 3131(1.40%) |  |
| Localized | 106 (45.69%) | 153237(68.59%) |  |
| Regional | 104 (44.83%) | 67026(30.00%) |  |
| His: |  |  | <0.001 |
| IDC | 184 (79.31%) | 164334(73.56%) |  |
| LC | 11 (4.74%) | 23801(10.65%) |  |
| Other | 37 (15.95%) | 3525(15.78%) |  |
| Tumor_size_cm: |  |  | <0.001 |
| >5 | 18 (7.76%) | 12888(5.77%) |  |
| <=1 | 9 (3.88%) | 62588(28.02%) |  |
| 1-2 | 61 (26.29%) | 83417(37.34%) |  |
| 2-3 | 78 (33.62%) | 41363(18.52%) |  |
| 3-4 | 45 (19.40%) | 15549(6.96%) |  |
| 4-5 | 21 (9.05%) | 7589(3.40%) |  |
| Marital_status: |  |  | <0.001 |
| Married | 231 (99.57%) | 129191(57.83%) |  |
| Unmarried | 1 (0.43%) | 94203(42.17%) |  |
| Lung_metastasis |  |  | <0.001 |
| no | 225 (96.98%) | 222839(99.75%) |  |
| yes | 7 (3.02%) | 555(0.25%) |  |
| Liver_metastasis |  |  | <0.001 |
| no | 223(96.12%) | 222877(99.77%) |  |
| yes | 9 (3.88%) | 517(0.23%) |  |
| Brain_metastasis |  |  | <0.001 |
| no | 229 (98.71%) | 223315(99.96%) |  |
| yes | 3 (1.29%) | 79(0.04%) |  |
| Bone_metastasis |  |  | <0.001 |
| no | 220 (94.83%) | 221477(99.14%) |  |
| yes | 12 (5.17%) | 1917(0.86%) |  |

BC, breast cancer; HR, hormone receptor; ER, estrogen receptor; PR, progesterone receptor; RT, radiation therapy; Her2, human epidermal growth factor receptor 2; His, histology; IDC, invasive ductal carcinoma; LC, lobular carcinoma.

Supplemental Table S5. Baseline demographic and clinical characteristics with HR-positive BC(OS) patients in seer cohort.

| Characteristics **(OS)** | All patients(n%) | ER(+)/PR(+) | ER(+)/PR(-) | ER(-)/PR(+) | P-value |
| --- | --- | --- | --- | --- | --- |
| N=202,216 | N=30,910 | N=2,653 |  |
| Race: |  |  |  |  | <0.001 |
| Black | 21,682(9.26) | 17,250 (8.53%) | 3,955 (12.80%) | 477 (18.00%) |  |
| Chinese | 3,607(1.51) | 3,054 (1.51%) | 513 (1.66%) | 40 (1.51%) |  |
| Other | 19,592(8.32) | 16,857 (8.34%) | 2,518 (8.15%) | 217 (8.18%) |  |
| White | 190,898(80.90) | 165,055 (81.62%) | 23,924 (77.39%) | 1,919 (72.31%) |  |
| Sex: |  |  |  |  | <0.001 |
| Female | 233,785(99.17) | 200,355 (99.08%) | 30,781 (99.58%) | 2,649 (99.85%) |  |
| Male | 1,994(0.83) | 1,861 (0.92%) | 129 (0.42%) | 4 (0.15%) |  |
| Grade: |  |  |  |  | <0.001 |
| Ⅰ | 64,923(27.63) | 59,496 (29.42%) | 5,376 (17.39%) | 51 (1.92%) |  |
| Ⅱ | 116,027(49.10) | 102,782 (50.83%) | 12,756 (41.27%) | 489 (18.43%) |  |
| Ⅲ | 54,438(23.10) | 39,663 (19.61%) | 12,675 (41.01%) | 2,100 (79.16%) |  |
| Ⅳ | 234(0.17) | 275 (0.14%) | 103 (0.33%) | 13 (0.49%) |  |
| RT: |  |  |  |  | <0.001 |
| no | 107,268(45.20) | 90,853 (44.93%) | 15,119 (48.91%) | 1,296 (48.90%) |  |
| yes | 128,511(54.80) | 111,363 (55.07%) | 15,791 (51.09%) | 1,357 (51.10%) |  |
| Age: |  |  |  |  | <0.001 |
| <30 | 991(0.41) | 790 (0.39%) | 167 (0.54%) | 34 (1.28%) |  |
| >=79 | 17,974(7.59) | 15,114 (7.47%) | 2,707 (8.76%) | 153 (5.77%) |  |
| 30-39 | 8,587(3.65) | 7,151 (3.54%) | 1,229 (3.98%) | 207 (7.80%) |  |
| 40-49 | 37,077(15.50) | 33,241 (16.44%) | 3,268 (10.57%) | 568 (21.41%) |  |
| 50-59 | 57,453(24.30) | 48,479 (23.97%) | 8,246 (26.68%) | 728 (27.44%) |  |
| 60-69 | 68,376(29.20) | 58,444 (28.90%) | 9,332 (30.19%) | 600 (22.62%) |  |
| 70-79 | 45,321(19.30) | 38,997 (19.28%) | 5,961 (19.29%) | 363 (13.68%) |  |
| T: |  |  |  |  | <0.001 |
| T1 | 152,924(65.00) | 134,047 (66.29%) | 17,641 (57.07%) | 1,236 (46.59%) |  |
| T2 | 66,730(28.30) | 55,315 (27.35%) | 10,294 (33.30%) | 1,121 (42.25%) |  |
| T3 | 12,000(5.03) | 9,700 (4.80%) | 2,111 (6.83%) | 189 (7.12%) |  |
| T4 | 4,125(1.74) | 3,154 (1.56%) | 864 (2.80%) | 107 (4.03%) |  |
| N: |  |  |  |  | <0.001 |
| N0 | 164,512(69.80) | 141,886 (70.17%) | 20,860 (67.49%) | 1,766 (66.57%) |  |
| N1 | 52,628(22.30) | 45,048 (22.28%) | 6,936 (22.44%) | 644 (24.27%) |  |
| N2 | 12,104(5.14) | 10,085 (4.99%) | 1,886 (6.10%) | 133 (5.01%) |  |
| N3 | 6,535(2.76) | 5,197 (2.57%) | 1,228 (3.97%) | 110 (4.15%) |  |
| M: |  |  |  |  | <0.001 |
| M0 | 232,666(98.70) | 199,769 (98.79%) | 30,298 (98.02%) | 2,599 (97.96%) |  |
| M1 | 3,113(1.30) | 2,447 (1.21%) | 612 (1.98%) | 54 (2.04%) |  |
| Laterality: |  |  |  |  | . |
| Bilateral | 15(0.01) | 12 (0.01%) | 3 (0.01%) | 0 (0.00%) |  |
| One side | 235,764(99.99) | 202,204 (99.99%) | 30,907 (99.99%) | 2,653 (100%) |  |
| Primary Site: |  |  |  |  | <0.001 |
| central | 12,096(5.09) | 1,0423 (5.15%) | 1,575 (5.10%) | 98 (3.69%) |  |
| Li | 13,409(5.74) | 11,499 (5.69%) | 1,751 (5.66%) | 159 (5.99%) |  |
| Lo | 18,345(7.73) | 15,697 (7.76%) | 2,449 (7.92%) | 199 (7.50%) |  |
| Other | 81,512(34.40) | 70,126 (34.68%) | 10,512 (34.01%) | 874 (32.94%) |  |
| Ui | 30,129(12.80) | 25,976 (12.85%) | 3,806 (12.31%) | 347 (13.08%) |  |
| Uo | 80,288(34.20) | 68,495 (33.87%) | 10,817 (35.00%) | 976 (36.79%) |  |
| Her2: |  |  |  |  | <0.001 |
| Negative | 207,883(88.20) | 182,226 (90.11%) | 23,738 (76.80%) | 1,919 (72.33%) |  |
| Positive | 27,896(11.80) | 19,990 (9.89%) | 7,172 (23.20%) | 734 (27.67%) |  |
| Nodes positive: |  |  |  |  | <0.001 |
| 0 | 165,993(70.40) | 142,759 (70.60%) | 21,385 (69.18%) | 1,849 (69.69%) |  |
| >=10 | 5,996(2.55) | 4,847 (2.40%) | 1,055 (3.41%) | 94 (3.54%) |  |
| 1-3 | 50,924(21.60) | 43,814 (21.67%) | 6,540 (21.16%) | 570 (21.49%) |  |
| 4-9 | 12,866(5.45) | 10,796 (5.34%) | 1,930 (6.24%) | 140 (5.28%) |  |
| Tumor stage: |  |  |  |  | <0.001 |
| Distant | 3,309(1.39) | 2,577 (1.27%) | 671 (2.17%) | 61 (2.30%) |  |
| Localized | 161,394(68.40) | 139,353 (68.91%) | 20,328 (65.77%) | 1,713 (64.57%) |  |
| Regional | 71,076(30.20) | 60,286 (29.81%) | 9,911 (32.06%) | 879 (33.13%) |  |
| His: |  |  |  |  | <0.001 |
| IDC | 173,177(73.60) | 147,750 (73.07%) | 23,113 (74.77%) | 2,314 (87.22%) |  |
| LC | 25,195(10.60) | 21,548 (10.66%) | 3,615 (11.70%) | 32 (1.21%) |  |
| Other | 37,407(15.80) | 32,918 (16.28%) | 4,182 (13.53%) | 307 (11.57%) |  |
| Tumor size cm: |  |  |  |  | <0.001 |
| >5 | 13,672(5.68) | 10,905 (5.39%) | 2,520 (8.15%) | 247 (9.31%) |  |
| <=1 | 65,391(27.70) | 57,294 (28.33%) | 7,676 (24.83%) | 421 (15.87%) |  |
| 1-2 | 88,040(37.50) | 77,156 (38.16%) | 10,059 (32.54%) | 825 (32.11%) |  |
| 2-3 | 43,862(18.60) | 36,873 (18.23%) | 6,326 (20.47%) | 663 (24.99%) |  |
| 3-4 | 16,658(7.07) | 13,466 (6.66%) | 2,839 (9.18%) | 353 (13.31%) |  |
| 4-5 | 8,156(3.47) | 6,522 (3.23%) | 1,490 (4.82%) | 144 (5.43%) |  |
| Marital status: |  |  |  |  | <0.001 |
| Married | 133,767(56.60) | 1,15427 (57.08%) | 16,840 (54.48%) | 1,500 (56.53%) |  |
| Unmarried | 102,012(43.40) | 86,789 (42.92%) | 14,070 (45.52%) | 1,153 (43.47%) |  |
| Lung metastasis: |  |  |  |  | <0.001 |
| no | 235,194(99.80) | 201,770 (99.78%) | 30,791 (99.62%) | 2,633 (99.25%) |  |
| yes | 585(0.20) | 446 (0.22%) | 119 (0.38%) | 20 (0.75%) |  |
| Liver metastasis: |  |  |  |  | <0.001 |
| no | 235,241(99.80) | 201,828 (99.81%) | 30,774 (99.56%) | 2,639 (99.47%) |  |
| yes | 538(0.23) | 388 (0.19%) | 136 (0.44%) | 14 (0.53%) |  |
| Brain metastasis: |  |  |  |  | <0.001 |
| no | 235,694(99.97) | 202,157 (99.97%) | 30,885 (99.92%) | 2,652 (99.96%) |  |
| yes | 85(0.03) | 59 (0.03%) | 25 (0.08%) | 1 (0.04%) |  |
| Bone metastasis: |  |  |  |  | <0.001 |
| no | 233,770(99.10) | 200,584 (99.19%) | 30,555 (98.85%) | 2,631 (99.17%) |  |
| yes | 2,009(0.90) | 1,632 (0.81%) | 355 (1.15%) | 22 (0.83%) |  |

BC, breast cancer; HR, hormone receptor; ER, estrogen receptor; PR, progesterone receptor; RT, radiation therapy; Her2, human epidermal growth factor receptor 2; His, histology; IDC, invasive ductal carcinoma; LC, lobular carcinoma

Supplemental Table S6. The distribution of each subgroup of the HR-positive BC cohorts

| Characteristic | OS | | |  | | BCSS | | | |
| --- | --- | --- | --- | --- | --- | --- | --- | --- | --- |
| All patients n(%) | Training set | Validation set |  | | All patients n(%) | | Training set | Validation set |
| n(%) | n(%) |  | | n(%) | n(%) |
| Grade: | 235,779 | 165,047 | 70,732 |  | | 223,394 | | 156,378 | 67,016 |
| Ⅰ | 64,923(27.54) | 45,409 (27.51) | 19,514 (27.59) | | 61,553(27.55) | | 43,113 (27.57) | | 18,440 (27.52) |
| Ⅱ | 116,027(49.21) | 81,275 (49.24) | 34,752 (49.13) | | 109,737(49.12) | | 76,794 (49.11) | | 32,943 (49.16) |
| Ⅲ | 54,438(23.09) | 38,089 (23.08) | 16,349 (23.11) | | 51,738(23.16) | | 36,218 (23.16) | | 15,520 (23.16) |
| Ⅳ | 234(0.10) | 274 (0.17) | 117 (0.17) | | 366(0.16) | | 253 (0.16) | | 113 (0.17) |
| Marital status: | |  |  |  | |  | |  |  |
| Married | 133,767(56.60) | 93,708 (56.78) | 40,059 (56.63) | | 129,191(57.83) | | 90,417 (57.82) | | 38,774 (57.86) |
| Unmarried | 102,012(43.40) | 71,339 (43.22) | 30,673 (43.37) | | 94,203(42.17) | | 65,961 (42.18) | | 28,242 (42.14) |
| Sex: |  |  |  |  | |  | |  |  |
| Female | 233,785(99.17) | 163,640 (99.15) | 70,145 (99.17) | | 221,667(99.23) | | 155,153 (99.22) | | 66,514 (99.25) |
| Male | 19,94(0.83) | 1,407 (0.85) | 587 (0.83) | | 1,727(0.77) | | 1,225 (0.78) | | 502 (0.75) |
| Primary Site: | |  |  |  | |  | |  |  |
| central | 12,096(5.09) | 8,494 (5.15) | 3,602 (5.09) | | 11,201(5.01) | | 7,806 (4.99) | | 3,395 (5.07) |
| Li | 13,409(5.74) | 9,352 (5.67) | 4,057 (5.74) | | 12,676(5.67) | | 8,835 (5.65) | | 3,841 (5.73) |
| Lo | 18,345(7.73) | 12,874 (7.80) | 5,471 (7.73) | | 17,415(7.80) | | 12,199 (7.80) | | 5,216 (7.78) |
| Other | 81,512(34.40) | 57,183 (34.65) | 24,329 (34.40) | | 77,160(34.54) | | 54,150 (34.63) | | 23,010 (34.34) |
| Ui | 30,129(12.80) | 21,047 (12.75) | 9,082 (12.84) | | 28,718(12.86) | | 20,035 (12.81) | | 8,683 (12.96) |
| Uo | 80,288(34.20) | 56,097 (33.99) | 24,191 (34.20) | | 76,224(34.12) | | 53,353 (34.12) | | 22,871 (34.13) |
| Laterality: |  |  |  |  | |  | |  |  |
| Bilateral | 15(0.01) | 10 (0.01) | 5 (0.01) | | 15(0.01) | | 9 (0.01) | | 6 (0.01) |
| One side | 235,764(99.99) | 165,037 (99.99) | 70,727 (99.9) | | 223,379(99.99) | | 156,369 (99.99) | | 67,010 (99.99) |
| Nodes positive: | |  |  |  | |  | |  |  |
| 0 | 165,993(70.40) | 116,229 (70.42) | 49,764 (70.36) | | 157,472(70.49) | | 110,088 (70.40) | | 47,384(70.70) |
| >=10 | 5,996(2.55) | 4,193 (2.54) | 1,803 (2.55) | | 5,606(2.51) | | 3,948 (2.52) | | 1,658 (2.47) |
| 1-3 | 50,924(21.60) | 35,616 (21.58) | 15,308 (21.64) | | 48,209(21.58) | | 33,758 (21.59) | | 14,451 (21.56) |
| 4-9 | 12,866(5.45) | 9,009 (5.46) | 3,857 (5.45) | | 12,107(5.42) | | 8,584 (5.49) | | 3,523 (5.26) |
| His: |  |  |  |  | |  | |  |  |
| IDC | 173,177(73.60) | 121,102(73.37) | 52,075 (73.62) | | 164,334(73.56) | | 115,179 (73.65) | | 49,155 (73.35) |
| LC | 25,195(10.60) | 17,705 (10.73) | 7,490 (10.59) | | 23,801(10.65) | | 16,654 (10.65) | | 7,147 (10.66) |
| Other | 37,407(15.80) | 26,240 (15.90) | 11,167 (15.79) | | 35,259(15.78) | | 24,545 (15.70) | | 10,714 (15.99) |
| Race: |  |  |  |  | |  | |  |  |
| Black | 21,682(9.26) | 15,134 (9.17) | 6,548 (9.26) | | 20,353(9.11) | | 14,299 (9.14) | | 6,054 (9.03) |
| Chinese | 3,607(1.51) | 2,538 (1.54) | 1,069 (1.51) | | 3,532(1.58) | | 2,508 (1.60) | | 1,024 (1.53) |
| Other | 19,592(8.32) | 13,710 (8.31) | 5,882 (8.32) | | 19,031(8.52) | | 13,262 (8.48) | | 5,769 (8.61) |
| White | 190,898(80.90) | 133,665 (80.99) | 57,233 (80.92) | | 180,478(80.79) | | 126,309 (80.77) | | 54,169 (80.83) |
| RT: |  |  |  |  | |  | |  |  |
| no | 107,268(45.20) | 75,318 (45.63) | 31,950 (45.17) | | 99,755(44.65) | | 69,832 (44.66) | | 29,923 (44.65) |
| yes | 128,511(54.80) | 89,729 (54.37) | 38,782 (54.83) | | 123,639(55.35) | | 86,546 (55.34) | | 37,093 (55.35) |
| Age: |  |  |  |  | |  | |  |  |
| <30 | 991(0.41) | 698 (0.42) | 293 (0.41) | | 979(0.44) | | 704 (0.45) | | 275 (0.41) |
| >=79 | 17,974(7.59) | 12,607 (7.64) | 5,367 (7.59) | | 13,814(6.18) | | 9,659 (6.18) | | 4,155 (6.20) |
| 30-39 | 8,587(3.65) | 6,008 (3.64) | 2,579 (3.65) | | 8,534(3.82) | | 6,016 (3.85) | | 2,518 (3.76) |
| 40-49 | 37,077(15.50) | 26,084 (15.80) | 10,993 (15.54) | | 36,750(16.45) | | 25,691 (16.43) | | 11,059 (16.50) |
| 50-59 | 57,453(24.30) | 40,270 (24.40) | 17,183 (24.29) | | 56,407(25.25) | | 39,480 (25.25) | | 16,927 (25.26) |
| 60-69 | 68,376(29.20) | 47,697 (28.90) | 20,679 (29.24) | | 65,678(29.40) | | 45,930 (29.37) | | 19,748 (29.47) |
| 70-79 | 45,321(19.30) | 31,683 (19.20) | 13,638 (19.28) | | 41,232(18.46) | | 28,898 (18.48) | | 12,334 (18.40) |
| Her2: |  |  |  |  | |  | |  |  |
| Negative | 207,883(88.20) | 145,473 (88.14) | 62,410 (88.23) | | 196,717(88.06) | | 137,630 (88.01) | | 59,087 (88.17) |
| Positive | 27,896(11.80) | 19,574 (11.86) | 8,322 (11.77) | | 26,677(11.94) | | 18,748 (11.99) | | 7,929 (11.83) |
| Tumor stage: |  |  |  |  | |  | |  |  |
| Distant | 3,309(1.39) | 2,328 (1.41) | 981 (1.39) | | 3,131(1.40) | | 2,205 (1.41) | | 926 (1.38) |
| Localized | 161,394(68.40) | 112,987 (68.46) | 48,407 (68.44) | | 153,237(68.59) | | 107,124 (68.50) | | 46,113 (68.85) |
| Regional | 71,076(30.20) | 49,732 (30.13) | 21,344 (30.18) | | 67,026(30.00) | | 47,049 (30.09) | | 19,977 (29.77) |
| Bone metastasis: | |  |  |  | |  | |  |  |
| no | 233,770(99.10) | 163,650 (99.15) | 70,120 (99.13) | | 221,477(99.14) | | 155,031 (99.14) | | 66,446 (99.15) |
| yes | 2,009(0.90) | 1,397 (0.85) | 612 (0.87) | | 1,917(0.86) | | 1,347 (0.86) | | 570 (0.85) |
| Brain metastasis: | |  |  |  | |  | |  |  |
| no | 235,694(99.97) | 164,986 (99.96) | 70,708 (99.97) | | 223,315(99.96) | | 156,322 (99.96) | | 66,993 (99.97) |
| yes | 85(0.03) | 61 (0.04) | 24 (0.03) | | 79(0.04) | | 56 (0.04) | | 23 (0.03) |
| Liver metastasis: | |  |  |  | |  | |  |  |
| no | 235,241(99.80) | 164,671 (99.77) | 70,570 (99.77) | | 222,877(99.77) | | 156,014 (99.77) | | 66,863 (99.17) |
| yes | 538(0.23) | 376 (0.23) | 162 (0.23) | | 517(0.23) | | 364 (0.23) | | 153 (0.23) |
| Lung metastasis: | |  |  |  | |  | |  |  |
| no | 235,194(99.80) | 164,629 (99.75) | 70,565 (99.76) | | 222,839(99.75) | | 155,985 (99.75) | | 66,854 (99.76) |
| yes | 585(0.20) | 418 (0.25) | 167 (0.24) | | 555(0.25) | | 393 (0.25) | | 162 (0.24) |
| Tumor size cm: | |  |  |  | |  | |  |  |
| >5 | 13,672(5.68) | 9,653 (5.85) | 4,019 (5.68) | | 12,888(5.77) | | 9,019 (5.77) | | 3,869 (5.77) |
| <=1 | 65,391(27.70) | 45,801 (27.75) | 19,590 (27.70) | | 62,588(28.02) | | 44,073 (28.18) | | 18,515 (27.63) |
| 1-2 | 88,040(37.50) | 61,523 (37.28) | 26,517 (37.49) | | 83,417(37.34) | | 58,013 (37.10) | | 25,404 (37.91) |
| 2-3 | 43,862(18.60) | 30,712 (18.61) | 13,150 (18.59) | | 41,363(18.52) | | 29,126 (18.63) | | 12,237 (18.26) |
| 3-4 | 16,658(7.07) | 11,658 (7.06) | 5,000 (7.07) | | 15,549(6.96) | | 10,903 (6.97) | | 4,646 (6.93) |
| 4-5 | 8,156(3.47) | 5,700 (3.45) | 2,456 (3.47) | | 7,589(3.40) | | 5,244 (3.35) | | 2,345 (3.50) |
| T: |  |  |  |  | |  | |  |  |
| T1 | 152,924(65.00) | 106,975 (64.81) | 45,949 (64.96) | | 145,531(65.15) | | 101,739 (65.06) | | 43,792 (65.35) |
| T2 | 66,730(28.30) | 46,737 (28.32) | 19,993 (28.27) | | 62,764(28.10) | | 44,039 (28.16) | | 18,725 (27.94) |
| T3 | 12,000(5.03) | 8,441 (5.11) | 3,559 (5.03) | | 11,364(5.09) | | 7,942 (5.08) | | 3,422 (5.11) |
| T4 | 4,125(1.74) | 2,894 (1.75) | 1,231 (1.74) | | 3,735(1.67) | | 2,658 (1.70) | | 1,077 (1.69) |
| N: |  |  |  |  | |  | |  |  |
| N0 | 164,512(69.80) | 115,162 (69.78) | 49,350 (69.77) | | 156,021(69.84) | | 109,097 (69.76) | | 46,924 (70.02) |
| N1 | 52,628(22.30) | 36,832 (22.32) | 15,796 (22.33) | | 49,857(22.32) | | 34,873 (22.30) | | 14,984 (22.36) |
| N2 | 12,104(5.14) | 8,470 (5.13) | 3,634 (5.14) | | 11,391(5.10) | | 8,087 (5.17) | | 3,304 (4.93) |
| N3 | 6,535(2.76) | 4,583 (2.78) | 1,952 (2.76) | | 6,125(2.74) | | 4,321 (2.76) | | 1,804 (2.69) |
| M: |  |  |  |  | |  | |  |  |
| M0 | 232,666(98.70) | 162,856 (98.67) | 69,810 (98.70) | | 220,452(98.68) | | 154,305 (98.67) | | 66,147 (98.70) |
| M1 | 3,113(1.30) | 2,191 (1.33) | 922 (1.30) | | 2,942(1.32) | | 2,073 (1.33) | | 869 (1.30) |
| ER: |  |  |  |  | |  | |  |  |
| negative | 2,653(1.14) | 1,846 (1.12) | 807 (1.14) | | 2,531(1.13) | | 1,814 (1.16) | | 717 (1.07) |
| positive | 233,126(98.86) | 163,201 (98.88) | 69,925 (98.9) | | 220,863(98.87) | | 154,564 (98.84) | | 66,299 (98.93) |
| PR: |  |  |  |  | |  | |  |  |
| negative | 30,910(13.20) | 21,583 (13.08) | 9,327 (13.2) | | 29,086(13.02) | | 2,0497 (13.1) | | 8,589 (12.8) |
| positive | 204,869(86.80) | 143,464 (86.92) | 61,405 (86.8) | | 194,308(86.98) | | 135,881 (86.9) | | 58,427 (87.2) |

HR, hormone receptor; ER, estrogen receptor; PR, progesterone receptor; RT, radiation therapy; Her2, human epidermal growth factor receptor 2; His, histology; IDC, invasive ductal carcinoma; LC, lobular carcinoma.
